# Supplementary material for: Impact of smoking on health system costs among cancer patients in a retrospective cohort study in Ontario, Canada
Source: PubMed Central journal article supplement — BMJ Open. 2019 Jun 21;9(6):e026022. doi: 10.1136/bmjopen-2018-026022 (PMC6596959; doi:10.1136/bmjopen-2018-026022), 2019-06-21
Supplement: bmjopen-2018-026022.draft_revisions.pdf [file bmjopen-2018-026022.draft_revisions.pdf]

# BMJ Open

BMJ Open is committed to open peer review. As part of this commitment we make the peer review history of every article we publish publicly available.

When an article is published we post the peer reviewers' comments and the authors' responses online. We also post the versions of the paper that were used during peer review. These are the versions that the peer review comments apply to.

The versions of the paper that follow are the versions that were submitted during the peer review process. They are not the versions of record or the final published versions. They should not be cited or distributed as the published version of this manuscript.

BMJ Open is an open access journal and the full, final, typeset and author-corrected version of record of the manuscript is available on our site with no access controls, subscription charges or pay-per-view fees (<http://bmjopen.bmj.com>).

If you have any questions on BMJ Open's open peer review process please email [info.bmjopen@bmj.com](mailto:info.bmjopen@bmj.com)

# BMJ Open

## Impact of Smoking on Health System Costs among Cancer Patients

|                               |                                                                                                                                                                                                                                                                                                                                                                                                                                                                     |
|-------------------------------|---------------------------------------------------------------------------------------------------------------------------------------------------------------------------------------------------------------------------------------------------------------------------------------------------------------------------------------------------------------------------------------------------------------------------------------------------------------------|
| Journal:                      | <i>BMJ Open</i>                                                                                                                                                                                                                                                                                                                                                                                                                                                     |
| Manuscript ID                 | bmjopen-2018-026022                                                                                                                                                                                                                                                                                                                                                                                                                                                 |
| Article Type:                 | Research                                                                                                                                                                                                                                                                                                                                                                                                                                                            |
| Date Submitted by the Author: | 22-Aug-2018                                                                                                                                                                                                                                                                                                                                                                                                                                                         |
| Complete List of Authors:     | Isaranuwachai, Wanrudee; St. Michael's Hospital, Li Ka Shing Knowledge Institute, Centre for excellence in Economic Analysis Research (CLEAR)<br>deOliveira, Claire; Centre for Addiction and Mental Health<br>Mittmann, Nicole; Cancer Care Ontario; Sunnybrook Health Sciences Centre<br>Evans, William ; Cancer Care Ontario<br>Peter, Alice; Cancer Care Ontario<br>Truscott, Rebecca ; Cancer Care Ontario<br>Chan, Kelvin; Sunnybrook Health Sciences Centre, |
| Keywords:                     | Smoking, Healthcare costs, Health system costs, Cancer, Economic burden                                                                                                                                                                                                                                                                                                                                                                                             |
|                               |                                                                                                                                                                                                                                                                                                                                                                                                                                                                     |

SCHOLARONE™  
Manuscripts

Peer Review Only

Impact of smoking on health system costs among cancer patients

# Impact of Smoking on Health System Costs among Cancer Patients

Wanrudee Isaranuwachai<sup>1,3-5</sup>; Claire de Oliveira<sup>1,3,5,6</sup>; Nicole Mittmann<sup>1-3,7</sup>; William K. Evans<sup>2</sup>; Alice Peter<sup>2</sup>; Rebecca Truscott<sup>2</sup>; Kelvin Kar-Wing Chan<sup>1-3,5,7,8</sup>

1. Canadian Centre for Applied Research in Cancer Control, Cancer Care Ontario, Toronto, Ontario, Canada
2. Cancer Care Ontario, Toronto, Ontario, Canada
3. University of Toronto, Toronto, Ontario, Canada
4. St. Michael's Hospital, Toronto, Ontario, Canada
5. Institute for Clinical Evaluative Sciences, Toronto, Ontario, Canada
6. Centre for Addiction and Mental Health, Toronto, Ontario, Canada
7. Sunnybrook Research Institute, Toronto, Ontario, Canada
8. Sunnybrook Odette Cancer Centre, Toronto, Ontario, Canada

\*Correspondence to:

Wanrudee Isaranuwachai, PhD  
Research Scientist, Centre for Excellence in Economic Analysis Research, Li Ka Shing Knowledge Institute, St. Michael's Hospital  
Assistant Professor, Institute for Health Policy, Management & Evaluation, University of Toronto  
T: 416-864-6060 ext. 77074  
E: [isaranuwatcw@smh.ca](mailto:isaranuwatcw@smh.ca)  
W: [www.clear-theeconomics.ca](http://www.clear-theeconomics.ca) | [www.hubresearch.ca](http://www.hubresearch.ca)

Word count (main text): 2,619/4,000

Impact of smoking on health system costs among cancer patients

## ABSTRACT

### Objective

Smoking is the main modifiable cancer risk factor. The objective of this study was to examine the impact of smoking on health system costs among newly diagnosed adult cancer patients. Specifically, costs of cancer patients who were current smokers were compared with those of non-smokers from a publicly funded health system perspective.

### Methods

This population-based cohort study of cancer patients used administrative databases to identify smokers and non-smokers (1 April 2014 - 31 March 2016) with  $\geq 1$ -year follow-up. Researchers estimated the costs for health services such as hospitalizations, emergency room visits, drugs, home care services, and physician services (from time of diagnosis onwards). The difference in cost (i.e., incremental cost) between cancer patients who were smokers and those who were non-smokers was estimated using a generalized linear model (with log link and gamma distribution), and adjusted for age, sex, neighborhood income, rurality, cancer site, cancer stage, geographical region, and comorbidities,

### Results

This study identified 3,606 smokers and 14,911 non-smokers. Smokers were significantly younger (61 vs 65 years), more likely to be male (53%), lived in poorer neighborhoods, had more advanced cancer stage, and were more likely to die within one year of diagnosis, compared to non-smokers. The regression model revealed that on average, smokers had significantly higher monthly healthcare costs (\$5,091) than non-smokers (\$4,847),  $p < 0.05$ .

### Conclusions

Smoking status has a significant impact on healthcare costs among cancer patients. On average, smokers incurred higher healthcare costs than non-smokers. These findings provide a further rationale for efforts to introduce evidence-based smoking cessation programs as a standard of care for cancer patients as they have the potential to not only improve patients' outcomes but also to reduce the economic burden of smoking on the healthcare system.

Impact of smoking on health system costs among cancer patients

## Keywords:

Smoking; Healthcare costs; Health system costs; Cancer; Economic burden

## Strengths and Limitations of this study

- Findings from this study support the integration of smoking cessation programs into cancer care treatment plans
- This study adds to the literature by providing up-to-date and precise health care cost estimates of smoking using existing administrative person-level costing approaches
- A limitation of this study is that it excludes a subset of relevant variables that may have had an influence on health outcomes and cost due to the nature of the study design (e.g., type of tumour, amount of duration of smoking)
- This study focused on the cost incurred to the public healthcare payer; and therefore, indirect costs were not considered and could be explored in future research
- The findings from this study should motivate policy makers to design, implement, and fund smoking cessation programs, which have the potential not only to improve patients' treatment outcomes but also to reduce the economic burden of smoking on the healthcare system

Impact of smoking on health system costs among cancer patients

## INTRODUCTION

Cancer care is a substantial component of health care expenditures of developed countries.(1-3) In Canada, the economic burden of cancer was estimated to be \$7.5 billion in 2012.(4) It is well recognized that smoking is the main modifiable risk factor for cancer (5) and it is estimated that it contributes to approximately 30% of all cancer deaths.(6, 7) Smoking can also harm directly or indirectly almost every organ of the body and is responsible for a number of other chronic diseases that contribute to higher health care costs.(5, 8-11) Quitting smoking after a diagnosis of cancer has been associated with improved general health, better quality of life, reduced toxicity, greater response to treatment (such as radiation therapy), and decreased risk of disease recurrence and second primary cancers.(12-14) Nevertheless, cancer patients are just as likely to smoke as the general public (with the smoking rate being approximately 20%);(15) furthermore, smoking cessation programs are rare in oncology settings.(12, 13, 16)

Although the impact of smoking on healthcare costs has been examined in the general population, there is very little information on the impact of smoking on the cost of cancer care in patients who are smokers compared to those who are not. We hypothesized that smoking would be associated with higher overall health system costs as a result of the need to manage more frequent and severe toxicities of treatment, more frequent disease recurrence, as well as more non-cancer related morbidities.

We compared the health system costs of cancer patients who were current smokers with those of non-smokers between 2014 and 2016, from the perspective of a public healthcare payer, using administrative databases in Ontario, Canada. Understanding the cost burden of smokers with cancer may help drive policy change by providing an economic argument for investing in cessation resources and programs for cancer patients who smoke.

## MATERIALS AND METHODS

This study was a secondary data analysis using existing administrative databases at Cancer Care Ontario (CCO) and the Institute for Clinical Evaluative Sciences (ICES), both located in Toronto, Ontario, Canada. Research ethics approval was obtained from St. Michael's Hospital, Toronto, Ontario, Canada.

### Study population and setting

The study population consisted of newly diagnosed adult cancer patients, aged  $\geq 18$  years, who received ambulatory care from one of the 14 Regional Cancer Centres (RCCs) in Ontario between 1 April 2014 and 31 March 2015. The Ontario Cancer Registry (OCR) was used to identify our study population. We excluded patients with: 1) an invalid health card (i.e., who were not eligible for public health care insurance); 2) an invalid death date (i.e., where death date was on or before the date of diagnosis); 3) missing data on smoking status; 4) a cancer stage of zero; 5) missing data on neighborhood-level income, geographical location, or rurality of residence; 6) lost health care coverage during the follow-up time; or 7) had multiple cancers. Each patient was followed until death or the end of the observation period (31 March 2016), whichever came first.

Impact of smoking on health system costs among cancer patients

## Study population sub-groups (smokers and non-smokers)

The study population of cancer patients was divided into those who were identified as smokers and non-smokers. Cancer patients who were either currently smoking at the time of diagnosis or who had smoked in the previous 6 months of their first ambulatory care visit were identified as *smokers*, whereas all others were identified as *non-smokers*. Information on *smoking status* was obtained from the *CCO Smoking Cessation Dataset (CCOSCD)*, which is part of the Activity Level Reporting (ALR) database housed at CCO. The CCOSCD collects information on the self-reported smoking status of newly diagnosed ambulatory cancer patients, whether the current smoker has been advised to quit, and whether the patient has been referred for smoking cessation counselling and/or pharmacotherapy.<sup>(17)</sup> Each RCC submits the data on these metrics on a monthly basis to CCO as part of CCO's Smoking Cessation Program. S1 Appendix describes the data elements in the dataset and their definitions.

## Data sources and variables

A number of databases were used to obtain healthcare utilization data: the ALR database, the New Drug Funding Program (NDFP) database, the Ontario Drug Benefit (ODB) claims database, the Discharge Abstract Database (DAD) obtained from the Canadian Institute for Health Information (CIHI), the National Ambulatory Care Reporting System (NACRS) obtained from CIHI, the Ontario Health Insurance Program (OHIP) claims database, the Home Care Database (HCD), the Continuing Care Reporting System (CCRS), and the National Rehabilitation Reporting System (NRS). Table 1 provides a brief description of each database.

**Table 1. Administrative databases used in the analysis**

| Database   | Description                                                                                                                                                                                                                                                                                                                                                                                                                                                                                                                |
|------------|----------------------------------------------------------------------------------------------------------------------------------------------------------------------------------------------------------------------------------------------------------------------------------------------------------------------------------------------------------------------------------------------------------------------------------------------------------------------------------------------------------------------------|
| OCR        | The Ontario Cancer Registry is the largest population-based cancer registry in Canada. The OCR contains over 300 fields, including primary site of cancer, county of residence at diagnosis and health insurance number.                                                                                                                                                                                                                                                                                                   |
| ALR        | The Ontario Activity Level Reporting provides a set of data elements from selected Ontario Cancer Centers that cannot be obtained from other providers. This information is used to support management decision making process.                                                                                                                                                                                                                                                                                            |
| NDFP       | The New Drug Funding Program data are used for reimbursement decisions and to support cancer system planning for systemic therapy. To be eligible for reimbursement through the NDFP, hospitals must submit eligibility/enrolment data and treatment data in compliance with monthly billing deadlines. For treatment reimbursement, each patient must be enrolled in the NDFP by providing eligibility/enrolment data that include patient-specific demographic information and answers to a series of medical questions. |
| ODB        | The Ontario Drug Benefit Formulary lists prescription drugs that are covered for patients over 65 years, and selected other groups (e.g., those that require income supports).                                                                                                                                                                                                                                                                                                                                             |
| CIHI DAD   | Hospitalization and comorbidity data are in the Discharge Abstract Database from the Canadian Institute for Health Information.                                                                                                                                                                                                                                                                                                                                                                                            |
| CIHI NACRS | Emergency room visits and same day surgery data were obtained from the National Ambulatory Care Reporting System.                                                                                                                                                                                                                                                                                                                                                                                                          |

## Impact of smoking on health system costs among cancer patients

|      |                                                                                                       |
|------|-------------------------------------------------------------------------------------------------------|
| OHIP | Ontario Health Insurance Program reports outpatient physician visits based on fee-for-service claims. |
| HCD  | Home Care Database captures all home care services in Ontario.                                        |
| CCRS | The Continuing Care Reporting System reports utilization of continuing care.                          |
| NRS  | National Rehabilitation Reporting System captures rehabilitation utilization.                         |

*Healthcare costs*

The outcome of interest for the study was total and disaggregated healthcare costs from the perspective of the Ontario Ministry of Health and Long-Term Care (MOHLTC). Healthcare costs included costs associated with hospitalizations, same-day surgeries, emergency room (ER) visits, outpatient prescription drugs, rehabilitation, complex continuing care, home care services, physician services, and laboratory and diagnostic tests. Cost estimates were derived using an existing costing algorithm at ICES. For example, hospitalizations and ER visit costs were estimated by multiplying a resource intensity weight (measure of utilization) with an average cost per hospital stay or ER visit (unit cost).<sup>(18)</sup> Physician visit costs were obtained from the Ontario Schedule of Benefits for Physician Services.<sup>(19)</sup> Additional details on the methods to estimate cost can be found elsewhere.<sup>(4, 18, 20)</sup> Costs were adjusted to 2016 Canadian dollars (CAD) using the health component of the Consumer Price Index in health care category (1 CAD = approximately 0.78 US dollars).<sup>(21)</sup>

*Other variables*

Due to potential differences between smokers and non-smokers, we controlled for patient characteristics by adjusting for a number of variables such as age at diagnosis, sex, cancer site, cancer stage (where available), geographical location of residence (i.e., rurality and Local Health Integration Network (LHIN)), neighborhood income quintile, and comorbidity (measured by the Adjusted Clinical Groups® or ACG®), all of which were obtained from the previously mentioned databases. In Ontario, publicly funded health care services are administered on a regional basis by the LHINs, which serve as the regional health authority. Each of the 14 LHINs is responsible for a distinct geographical location.<sup>(22)</sup> The ACG® system is a patient case-mix adjustment system used to measure health status by grouping diagnoses into clinical groups. The goal of this system is to assign each patient a single value, which represents the patient's comorbidity (through his/her expected or actual use of health services), where a higher number refers to more comorbidities (0-4, 5-6, 7-9, and 10+).<sup>(23)</sup> For this study, we reported on cancer site according to the following sites or groupings: bladder; bronchus and lung; breast; colorectal; corpus uteri; head and neck; prostate; melanoma; and other. The extent of cancer was reported in one of 3 groups: stage 1-2; stage 3-4; and unknown stage.

**Analysis**

The raw costs for non-smokers and smokers were reported descriptively. To adjust for different follow up times, as some patients (particularly smokers) have a greater chance of dying than non-smokers, we estimated person-month costs.<sup>(24)</sup>

The output of the economic analysis was the incremental cost (reported in 2016 CAD) between cancer patients who smoked and those who did not. We analyzed our dependent



## Impact of smoking on health system costs among cancer patients

variable (monthly healthcare costs) using regression models to estimate the difference in expected health care cost between the two groups using recycled predictive methods,(24-26) as described in the following equation:

$$Cost_i = \beta_0 + \beta_1(smoking\ status)_i + \beta_2(age)_i + \beta_3(sex)_i + \beta_4(income\ quintile)_i + \beta_5(rurality)_i + \beta_6(cancer\ stage)_i + \beta_7(cancer\ type)_i + \beta_8(LHIN)_i + \epsilon_i$$

where  $cost_i$  represents a monthly cost of patient  $I$ ,  $\beta_x$  refers to a coefficient estimate of each variable,  $X$ , such as smoking status, age, and sex and  $\epsilon$  represents the error term. The smoking status variable was the primary independent variable, and the regression model was adjusted for potential confounding variables, such as age, sex, income, rurality, cancer stage, cancer site, geographical region (LHIN), and comorbidity. To accommodate for the skewness of cost data, a generalized linear model with log link and gamma family was used to estimate the incremental cost between smokers and non-smokers.(24, 27) We also conducted a Modified Park test to ensure that our selected model was the best fit.(24, 28)

## Patient and public involvement

There was no involvement of patients during the study period but there are knowledge translation activities with various knowledge users.

## RESULTS

There were 3,606 smokers and 14,911 non-smokers in our study cohort (see Table 2). Cancer patients who smoked were significantly younger (61 vs 65 years), more likely to be male (53% vs 45%), live in lower income neighborhoods (16% of non-smokers compared to 25% of smokers were in the lowest income quintile), and more likely to live in rural areas (18% vs 15%) compared to cancer patients who were non-smokers. Cancer stage data was available for approximately 70% of patients. Of those with available cancer stage data, smokers were more likely to have advanced cancer stages than non-smokers. Almost 40% of smokers were in stage 3-4 compared to approximately 27% of non-smokers. Roughly 25% of smokers died within 1 year of diagnosis compared to 15% of non-smokers who died over the same follow-up period. Approximately 30% of smokers were in the lowest comorbidity level (0-4) compared to 24% of non-smokers. Only 19% of smokers were in the highest comorbidity level (10+) compared to 23% of non-smokers. Lung cancer was the most common type of cancer among smokers followed by breast cancer. For non-smokers, the most common cancer type was breast cancer followed by prostate cancer and lung cancer (Table 2).

**Table 2. Demographic characteristics of study population between smokers and non-smokers**

| Variable*              | Non-smokers | Smokers     |
|------------------------|-------------|-------------|
| N                      | 14,911      | 3,606       |
| Mean age in years (SD) | 65.1 (13.6) | 60.6 (12.1) |

## Impact of smoking on health system costs among cancer patients

|                                        |                    |                    |
|----------------------------------------|--------------------|--------------------|
| Male                                   | 6,681 (44.8%)      | 1,907 (52.9%)      |
| Age groups in years, N (%)             |                    |                    |
| 18-44                                  | 1,116 (7.5%)       | 310 (8.6%)         |
| 45-54                                  | 1,973 (13.2%)      | 661 (18.3%)        |
| 55-64                                  | 3,443 (23.1%)      | 1,217 (33.7%)      |
| 65-74                                  | 4,525 (30.3%)      | 1,035 (28.7%)      |
| 75+                                    | 3,854 (25.8%)      | 383 (10.6%)        |
| Income quintile, N (%)                 |                    |                    |
| 1 (lowest)                             | 2,387 (16.0%)      | 887 (24.5%)        |
| 2                                      | 2,597 (17.4%)      | 818 (22.7%)        |
| 3                                      | 3,065 (20.6%)      | 691 (19.2%)        |
| 4                                      | 3,351 (22.5%)      | 649 (18.0%)        |
| 5 (highest)                            | 3,511 (23.5%)      | 561 (15.6%)        |
| Living in rural areas, N (%)           | 2,267 (15.2%)      | 662 (18.4%)        |
| Death within 1 year, N (%)             | 2,211 (14.8%)      | 850 (23.6%)        |
| Mean time from diagnosis to death (SD) | 255.2 days (163.3) | 236.8 days (159.6) |
| Comorbidity (ACG), N (%)               |                    |                    |
| 0-4                                    | 3,589 (24.1%)      | 1,092 (30.3%)      |
| 5-6                                    | 3,295 (22.1%)      | 838 (23.2%)        |
| 7-9                                    | 4,533 (30.4%)      | 985 (27.3%)        |
| 10+                                    | 3,494 (23.4%)      | 691 (19.2%)        |
| Cancer stage, N (%)                    |                    |                    |
| 1-2                                    | 6,378 (42.8%)      | 1,289 (35.7%)      |
| 3-4                                    | 3,958 (26.5%)      | 1,392 (38.6%)      |
| Unknown                                | 4,575 (30.7%)      | 925 (25.7%)        |
| Main cancer types, N (%)               |                    |                    |
| Lung                                   | 1,673 (11.2%)      | 1,017 (28.2%)      |
| Breast                                 | 3,088 (20.7%)      | 497 (13.8%)        |
| Head and neck                          | 614 (4.1%)         | 292 (8.1%)         |
| Prostate                               | 1,694 (11.4%)      | 290 (8.0%)         |
| Colorectal                             | 1,460 (9.8%)       | 268 (7.4%)         |
| Melanoma                               | 563 (3.8%)         | 81 (2.2%)          |
| Corpus uteri                           | 701 (4.7%)         | 64 (1.8%)          |
| Bladder                                | 196 (1.3%)         | 43 (1.2%)          |
| Other                                  | 4,922 (33.0%)      | 1,054 (29.3%)      |

Legend: ACG= Adjusted Clinical Groups®; N = sample size; SD = standard deviation.

Note: \* the two groups were significantly different across all variables ( $p < 0.05$ ).

Figure 1 reports the unadjusted monthly healthcare costs between the study groups. Generally, smokers incurred higher healthcare costs than non-smokers for hospitalizations, physician services, ER visits, home care services, and complex continuing care. Focusing on specific types of healthcare costs, smokers had approximately 30% higher hospitalization costs, 43% higher ER visit costs, 23% higher physician visit costs, and 30% higher home care costs

## Impact of smoking on health system costs among cancer patients

than non-smokers. Overall, total monthly health care costs were higher among smokers (\$5,649 ± \$7,169) than non-smokers (\$4,704 ± \$6,737).

### \*\*\*Figure 1. Unadjusted monthly healthcare costs between cancer patients who were smokers and non-smokers (2016 CAD)\*\*\*

From the adjusted regression model (controlling for age, sex, income, rurality, stage, disease site, geographical region, and comorbidity), on average, smokers had significantly higher monthly healthcare costs (\$5,091) than non-smokers (\$4,847). Smokers incurred \$244 (± 113) more in healthcare cost per month, or \$2,928 more per year than non-smokers, p=0.0047.

## DISCUSSION

Understanding the impact of smoking on the healthcare costs of cancer patients may strengthen the rationale for policy makers to further invest in smoking cessation programs. It is generally understood that smoking can lead to worse clinical outcomes, but there is a paucity of literature on the impact of smoking on healthcare costs among cancer patients. The findings from this analysis are aligned with the limited available literature. Specifically, we found that cancer patients who were smokers were younger and more commonly males compared to cancer patients who were not smokers, which is in line with the literature.(10, 29) Additionally, smokers had, on average, almost 20% higher total monthly healthcare costs than non-smokers. When focusing mainly on hospitalizations, the incremental cost due to smoking was approximately 30% higher than non-smokers, in contrast to an increase of up to 50% in incremental hospitalization costs among smokers reported in the literature.(9, 30) Our findings suggest that cancer patients who are smokers are responsible for a greater economic burden than non-smokers.

Evidence on the importance of smoking cessation for cancer patients has strengthened in recent years. Several cancer care institutions in the United States have emerged as leaders in this field by supporting smoking cessation programs.(31) Ontario is the first jurisdiction in North America to implement a systematic smoking cessation program in all of its RCCs. Under the leadership of CCO, the provincial agency responsible for improving the quality of cancer services in Ontario, a smoking cessation program provides support for new ambulatory cancer patients by screening patients for tobacco use, advising on the benefits of quitting, and offering referrals to smoking cessation resources. Understanding the impact of smoking on the healthcare costs incurred by cancer patients may further strengthen the rationale for the program and encourage policy makers (e.g., public healthcare payer) to invest in smoking cessation programs. The findings from this study may also be beneficial to other cancer agencies, and not-for-profit organizations (e.g., American Cancer Society, Worldwide Cancer Research, and Canadian Partnership Against Cancer) engaged in developing smoking cessation policies and implementing smoking cessation programs. In addition, this study may help to inform the general public about the burden of smoking among cancer patients, including motivating hospital and health system administrators about the incremental economic impact of failing to help cancer

## Impact of smoking on health system costs among cancer patients

patients quit smoking. The findings from this study support the integration of smoking cessation programs into cancer care treatment plans and will hopefully stimulate further research into the optimal implementation of smoking cessation programs in order to improve cancer care outcomes and reduce morbidity, mortality, and cost.

This study has strengths and limitations, which should be highlighted. The medical literature has called for more up-to-date and precise health care cost estimates of smoking.<sup>(9, 32)</sup> Existing Canadian literature has used cost estimates for smokers from the 1990s and/or employed high-level costing approaches, instead of using patient-level cost estimates. These prior estimates might not accurately reflect the true healthcare cost difference between smokers and non-smokers.<sup>(9, 32-34)</sup> This study represents a first step to systematically collect these data and to link them to data on system-level resources.

In terms of limitations, data on smoking status were limited to one assessment at the first ambulatory visit and, therefore, it is possible that patients may have changed their smoking status subsequently. Our analysis followed the intent-to-treat principle and was applied to both study groups (i.e., smokers at the time of diagnosis or who had quit in the last six months remained smokers throughout the analysis and vice versa). If some “smokers” quit smoking, their medical outcomes or tolerance to treatment may have been better than that of persistent smokers (presumably with less resource utilization and less cost). Consequently, this analysis may have provided a lower bound of the incremental cost. Individuals who had quit prior to 6 months would likely still have more health complications and resource utilization than life-long non-smokers. Classification of these patients as non-smokers may again lead to the possibility of an underestimation of the difference in cost between smokers and non-smokers.

Our analysis was also limited by the available follow-up data. As the follow-up period was relatively short, it is possible that the significant differences might be observed with a longer period of follow-up. It is also possible that, given the nature of the study design, relevant variables were not collected. For example, cancer stage data were available for the most common types of cancer (i.e., lung, breast, colorectal, and prostate cancer), but not for other tumour types, such as head and neck cancer. In addition, there were no data available on the amount or duration of smoking, which would likely have an influence on health outcomes and cost. Smoking has been shown to increase both direct and indirect costs.<sup>(9, 33, 34)</sup> However, because our study used administrative data, indirect costs were not explored – this could be an area for future research. Finally, there would be a cost to implement a smoking cessation program, which was not included in this analysis, and may cancel out some of the economic benefits of getting smokers to stop smoking.

In conclusion, cancer patient smoking status has a significant impact on health system costs. On average, smokers incurred higher healthcare costs than non-smokers. These findings provide an additional reason for the introduction of evidence-based smoking cessation programs for cancer patients. The findings from this study should motivate policy makers to design, implement, and fund smoking cessation programs, which have the potential not only to improve patients’ treatment outcomes but also to reduce the economic burden of smoking on the healthcare system.

Impact of smoking on health system costs among cancer patients

## Abbreviations

|        |                                                        |
|--------|--------------------------------------------------------|
| ACG®   | Adjusted Clinical Groups®                              |
| ARCC   | Canadian Centre for Applied Research in Cancer Control |
| CAD    | Canadian dollars                                       |
| CCO    | Cancer Care Ontario                                    |
| CCOSCD | CCO Smoking Cessation Dataset                          |
| ER     | emergency room                                         |
| ICES   | Institute for Clinical Evaluative Sciences             |
| LHIN   | Local Health Integration Network                       |
| MOHLTC | Ontario Ministry of Health and Long-Term Care          |
| RCCs   | Regional Cancer Centres                                |

## Acknowledgments

We would like to acknowledge the assistance of Refik Saskin and Lisa Ellison from the Institute for Clinical Evaluative Sciences, and Stephanie Young, Mohammad Hoque, Elisa Candido, Julie Klein-Geltink, Brooke Filsinger, the CCO Research Office, and the Data Disclosure Committee from Cancer Care Ontario including Ashna Jinah and Dr. Deena from St. Michael's Hospital for preparation of submission.

This study made use of de-identified data from the ICES Data Repository, which is managed by the Institute for Clinical Evaluative Sciences with support from its funders and partners: Canada's Strategy for Patient-Oriented Research (SPOR), the Ontario SPOR Support Unit, the Canadian Institutes of Health Research and the Government of Ontario. The opinions, results and conclusions reported are those of the authors. No endorsement by ICES or any of its funders or partners is intended or should be inferred. Parts of this material are based on data and/or information compiled and provided by CIHI. However, the analyses, conclusions, opinions and statements expressed in the material are those of the author(s), and not necessarily those of CIHI. Parts of this material are based on data and information provided by Cancer Care Ontario (CCO). The opinions, results, view, and conclusions reported in this paper are those of the authors only.

Impact of smoking on health system costs among cancer patients

## Contributors

All authors made important contributions to this work.

WI, CdO, NM, WE, AP, RT, KKWC contributed to this study's conception and design.

WI, NM, AP, RT were responsible for data collection and assembly.

All authors (WI, CdO, NM, WE, AP, RT, KKWC) were involved in data analysis and interpretation.

WI, CdO, NM, WE drafted the paper, and all authors critically reviewed and suggested amendments prior to submission.

The corresponding author attests that all listed authors meet authorship criteria and that no others meeting the criteria have been omitted.

## Funding:

This work was funded by the Canadian Centre for Applied Research in Cancer Control (ARCC). ARCC receives core funding from the Canadian Cancer Society Research Institute (Grant #: 2015-703549).

## Competing interests:

All authors have completed the ICMJE uniform disclosure form at [www.icmje.org/coi\\_disclosure.pdf](http://www.icmje.org/coi_disclosure.pdf) and declare: no support from any organization for the submitted work; no financial relationships with any organizations that might have an interest in the submitted work in the previous three years; no other relationships or activities that could appear to have influenced the submitted work.

## Ethics approval:

Research ethics approval was obtained from St. Michael's Hospital, Toronto, Ontario, Canada.

## Data sharing statement:

This study made use of de-identified data from the Institute for Clinical Evaluative Sciences and Cancer Care Ontario who have the right and control over the data used.

## Figure Legends

Figure 1. Unadjusted monthly healthcare costs between cancer patients who were smokers and non-smokers (2016 CAD)

Impact of smoking on health system costs among cancer patients

**Supporting Information**

S1 Appendix: Data elements and their definition of Cancer Care Ontario's Smoking Cessation Dataset (PDF)

For peer review only

1  
2  
3  
4  
5  
6  
7  
8  
9  
10  
11  
12  
13  
14  
15  
16  
17  
18  
19  
20  
21  
22  
23  
24  
25  
26  
27  
28  
29  
30  
31  
32  
33  
34  
35  
36  
37  
38  
39  
40  
41  
42  
43  
44  
45  
46  
47  
48  
49  
50  
51  
52  
53  
54  
55  
56  
57  
58  
59  
60

## REFERENCES

1. Kesselheim AS, Avorn J, Sarpatwari A. The High cost of prescription drugs in the United States: origins and prospects for reform. *JAMA*. 2016;316(8):858-71.
2. Vogler S, Vitry A. Cancer drugs in 16 European countries, Australia, and New Zealand: a cross-country price comparison study. *The Lancet Oncology*. 2016;17(1):39-47.
3. Canadian Cancer Society. Nearly 1 in 2 Canadians expected to get cancer: report 2017 [Available from: <http://www.cancer.ca/en/about-us/for-media/media-releases/national/2017/canadian-cancer-statistics/?region=bc>].
4. de Oliveira C, Weir S, Rangrej J, Krahn MD, Mittmann N, Hoch JS, et al. The economic burden of cancer care in Canada: a population-based cost study. *CMAJ open*. 2018;6(1):E1-E10.
5. Cancer Care Ontario. Cancer Risk Factors in Ontario: Tobacco. 2014.
6. American Cancer Society. Tobacco-related cancers fact sheet 2014 [cited 2014]. Available from: <http://www.cancer.org/cancer/cancercauses/tobaccocancer/tobacco-related-cancer-fact-sheet>.
7. Anand P, Kunnumakkara AB, Sundaram C, Harikumar KB, Tharakan ST, Lai OS, et al. Cancer is a preventable disease that requires major lifestyle changes. *Pharmaceutical Research* 2008;25(9):2097-116.
8. Zimovetz EA, Wilson K, Samuel M, Beard SM. A review of cost-effectiveness of varenicline and comparison of cost-effectiveness of treatments for major smoking-related morbidities. *Journal of Evaluation in Clinical Practice*. 2011;17(2):288-97.
9. Sari AA, Rezaei S, Arab M, Majdzadeh R, Matin BK, Zandian H. Effects of Smoking on Cost of Hospitalization and Length of Stay among Patients with Lung Cancer in Iran: a Hospital-Based Study. *Asian Pacific journal of cancer prevention: APJCP*. 2016;17(9):4421-6.
10. Sherratt F, Field J, Marcus M. Association between smoking and health outcomes in an economically deprived population: the Liverpool Lung Project. *J Epidemiol Community Health*. 2017;jech-2016-208730.
11. U.S. Department of Health and Human Services. The Health Consequences of Smoking: 50 Year of Progress. A Report of the Surgeon General. Atlanta, GA: U.S. Department of Health and Human Services, Centers for Disease Control and Prevention, National Center for Chronic Disease Prevention and Health Promotion, Office on Smoking and Health; 2014.
12. Toll BA, Brandon TH, Gritz ER, Warren GW, Herbst RS. Assessing tobacco use by cancer patients and facilitating cessation: an American Association for Cancer Research policy statement. *Clin Cancer Res*. 2013;19(8):1941-8.
13. Nayan S, Gupta MK, Strychowsky JE, Sommer DD. Smoking cessation interventions and cessation rates in the oncology population: an updated systematic review and meta-analysis. *Otolaryngol Head Neck Surg*. 2013;149(2):200-11.
14. Cancer Care Ontario. Cancer Fact: Reported tobacco screening increases among new cancer patients 2017 [Available from: [www.cancercareontario.ca/cancerfacts](http://www.cancercareontario.ca/cancerfacts)].
15. Statistics Canada. Current smoking trends 2015 [Available from: <https://www.statcan.gc.ca/pub/82-624-x/2012001/article/11676-eng.htm>].
16. Tota JE, Ramanakumar AV, Franco EL. Lung cancer screening: review and performance comparison under different risk scenarios. *Lung*. 2014;192(1):55-63.
17. Cancer Care Ontario. Cancer Care Ontario's Data Book - 2016-2017. 2016 [updated September 2016]. Available from: <https://cancercare.on.ca/ext/databook/db1516/>.



## Impact of smoking on health system costs among cancer patients

18. Wodchis WP, Bushmeneva K, Nikitovic M, McKillop I. Guidelines on person-level costing using administrative databases in Ontario. Toronto: Health Systems Performance Research Network. 2013.
19. Ontario Ministry of Health and Long-Term Care. Schedule of Benefits: Physician Services under the Health Insurance Act 2015 [Available from: [http://www.health.gov.on.ca/en/pro/programs/ohip/sob/physserv/sob\\_master20151221.pdf](http://www.health.gov.on.ca/en/pro/programs/ohip/sob/physserv/sob_master20151221.pdf).
20. Thein HH, Isaranuwachai W, Campitelli MA, Feld JJ, Yoshida E, Sherman M, et al. Health care costs associated with hepatocellular carcinoma: A population-based study. *Hepatology*. 2013;58(4):1375-84.
21. Statistics Canada. Consumer Price Index (CPI) 2017 [Available from: <http://www5.statcan.gc.ca/cansim/a26?lang=eng&retrLang=eng&id=3260020&paSer=&pattern=&stByVal=1&p1=1&p2=37&tabMode=dataTable&csid=>.
22. Ontario Ministry of Health and Long-Term Care. Ontario's LHINs 2017 [Available from: <http://www.lhins.on.ca/>.
23. University of Manitoba. Concept: Adjusted Clinical Groups(R) (ACG(R) - Overview 2015 [Available from: <http://mchp-appserv.cpe.umanitoba.ca/viewConcept.php?printer=Y&conceptID=1304>.
24. Glick HA, Doshi JA, Sonnad SS, Polsky D. *Economic evaluation in clinical trials*: OUP Oxford; 2014.
25. Brown ML, Riley GF, Potosky AL, Etzioni RD. Obtaining long-term disease specific costs of care: application to Medicare enrollees diagnosed with colorectal cancer. *Med Care*. 1999;37(12):1249-59.
26. Taplin SH, Barlow W, Urban N, Mandelson MT, Timlin DJ, Ichikawa L, et al. Stage, age, comorbidity, and direct costs of colon, prostate, and breast cancer care. *J Natl Cancer Inst*. 1995;87(6):417-26.
27. Barber J, Thompson S. Multiple regression of cost data: use of generalised linear models. *Journal of health services research & policy*. 2004;9(4):197-204.
28. Barber J, Thompson S. Multiple regression of cost data: use of generalised linear models. *J Health Serv Res Policy*. 2004;9(4):197-204.
29. Rezaei S, Karami Matin B, Hajizadeh M, Baziyar M, Akbari Sari A. Economic burden of smoking in Iran: A prevalence-based annual cost approach. *Asian Pacific Journal of Cancer Prevention*. 2017;18(10):2867-73.
30. Husaini BA, Levine RS, Lammers P, Hull P, Novotny M, Moonis M. Smoking, depression, and hospital costs of respiratory cancers: Examining race and sex variation. *Family Medicine and Community Health*. 2017;5(1):29-42.
31. Raymakers AJN, Mayo J, Lam S, FitzGerald JM, Whitehurst DGT, Lynd LD. Cost-Effectiveness Analyses of Lung Cancer Screening Strategies Using Low-Dose Computed Tomography: A Systematic Review. *Applied Health Economics and Health Policy*. 2016;14(4):409-18.
32. Feirman SP, Glasser AM, Teplitskaya L, Holtgrave DR, Abrams DB, Niaura RS, et al. Medical costs and quality-adjusted life years associated with smoking: a systematic review. *BMC public health*. 2016;16:646.
33. Krueger H, Turner D, Krueger J, Ready AE. The economic benefits of risk factor reduction in Canada: tobacco smoking, excess weight and physical inactivity. *Can J Public Health*. 2014;105(1):e69-e78.

## Impact of smoking on health system costs among cancer patients

1  
2  
3 34. Krueger J. Variation across Canada in the economic burden attributable to excess weight,  
4 tobacco smoking and physical inactivity. Canadian Journal of Public Health. 2015;106(4):E171.  
5  
6  
7  
8  
9  
10  
11  
12  
13  
14  
15  
16  
17  
18  
19  
20  
21  
22  
23  
24  
25  
26  
27  
28  
29  
30  
31  
32  
33  
34  
35  
36  
37  
38  
39  
40  
41  
42  
43  
44  
45  
46  
47  
48  
49  
50  
51  
52  
53  
54  
55  
56  
57  
58  
59  
60

For peer review only

**Figure 1. Unadjusted monthly healthcare costs between cancer patients who were smokers and non-smokers (2016 CAD)**

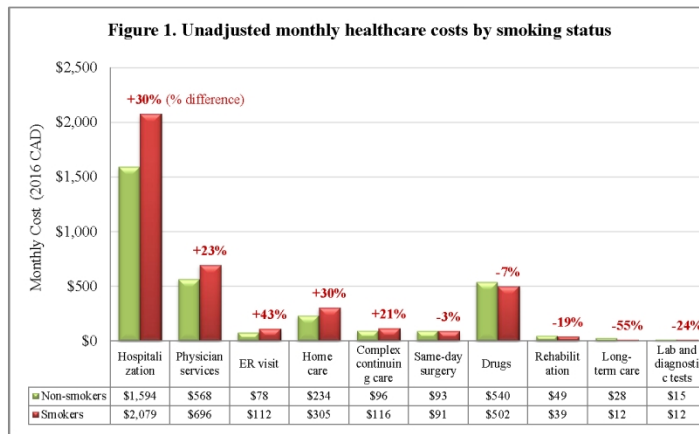

Legend: CAD = Canadian dollars.

Unadjusted monthly healthcare costs between cancer patients who were smokers and non-smokers (2016 CAD)

215x279mm (200 x 200 DPI)

S1 Appendix: Data elements and their definition of Cancer Care Ontario's Smoking Cessation Dataset

| <b>Data Element</b>        | <b>Definition</b>                                                                                                                                                                                                                                                                                                                                                                                                                                                                                                                                                                                    |
|----------------------------|------------------------------------------------------------------------------------------------------------------------------------------------------------------------------------------------------------------------------------------------------------------------------------------------------------------------------------------------------------------------------------------------------------------------------------------------------------------------------------------------------------------------------------------------------------------------------------------------------|
| Patient Chart Number       | Patient identifier code that is unique within the healthcare facility.                                                                                                                                                                                                                                                                                                                                                                                                                                                                                                                               |
| Submitting Hospital Number | The MOHLTC healthcare facility that submits activity to CCO.                                                                                                                                                                                                                                                                                                                                                                                                                                                                                                                                         |
| Registration Date          | Date this patient was first registered at this RCC and/or hospital for this disease.                                                                                                                                                                                                                                                                                                                                                                                                                                                                                                                 |
| Disease Sequence Number    | The numeric sequence assigned to a primary cancer for a patient at a specific healthcare facility.                                                                                                                                                                                                                                                                                                                                                                                                                                                                                                   |
| Visit Hospital Number      | MOHLTC Master Number and name for the reporting healthcare facility where the cancer activity occurred (known by CIHI as Institution Numbers).                                                                                                                                                                                                                                                                                                                                                                                                                                                       |
| Visit Program Code         | Primary cancer programs for clinic, planning and treatment activity. Includes; Radiation (RAD), Systemic (SYS), Surgical (SUR), Research (RE), Palliative (PA), Preventative Oncology (PO), or Psychosocial Oncology (PSO).                                                                                                                                                                                                                                                                                                                                                                          |
| SMK_Q1                     | Patient self-reported as being a current smoker or indicated they had smoked within the past 6 months.                                                                                                                                                                                                                                                                                                                                                                                                                                                                                               |
| SMK_Q1 Date                | The date the patient was asked SMK_Q1 (smoking status question).                                                                                                                                                                                                                                                                                                                                                                                                                                                                                                                                     |
| SMK_Q2                     | Patient was advised of the benefits of smoking cessation.                                                                                                                                                                                                                                                                                                                                                                                                                                                                                                                                            |
| SMK_Q3                     | Patient was recommended a referral to a smoking cessation program.                                                                                                                                                                                                                                                                                                                                                                                                                                                                                                                                   |
| SMK_Q3 Date                | The date when the patient was asked SMK_Q3 (assessed for quitting question).                                                                                                                                                                                                                                                                                                                                                                                                                                                                                                                         |
| SMK_Q4                     | Type of referral selected by patient. Referral is the act of directing or sending a patient to cessation service(s) for further action or support in making a quit attempt and becoming smoke free. The service should be arranged through the RCC (e.g., to a quit coach or to Canadian Cancer Society's Smokers Helpline fax referral program) to help the patient quit smoking. A referral is not simply the act of providing written information. Internal cessation referrals include services provided by the RCC (e.g. quit coaches), and external referrals are referred to outside the RCC. |

Legend: MOHLTC = Ministry of Health and Long-Term Care; CCO = Cancer Care Ontario; RCC = Regional Cancer Centre; CIHI = Canadian Institute for Health Inf

# BMJ Open

## Impact of Smoking on Health System Costs among Cancer Patients in a retrospective cohort study in Ontario, Canada

|                                 |                                                                                                                                                                                                                                                                                                                                                                                                                                                                      |
|---------------------------------|----------------------------------------------------------------------------------------------------------------------------------------------------------------------------------------------------------------------------------------------------------------------------------------------------------------------------------------------------------------------------------------------------------------------------------------------------------------------|
| Journal:                        | <i>BMJ Open</i>                                                                                                                                                                                                                                                                                                                                                                                                                                                      |
| Manuscript ID                   | bmjopen-2018-026022.R1                                                                                                                                                                                                                                                                                                                                                                                                                                               |
| Article Type:                   | Research                                                                                                                                                                                                                                                                                                                                                                                                                                                             |
| Date Submitted by the Author:   | 01-Feb-2019                                                                                                                                                                                                                                                                                                                                                                                                                                                          |
| Complete List of Authors:       | Isaranuwatthai, Wanrudee; St. Michael's Hospital, Li Ka Shing Knowledge Institute, Centre for excellence in Economic Analysis Research (CLEAR)<br>deOliveira, Claire; Centre for Addiction and Mental Health<br>Mittmann, Nicole; Cancer Care Ontario; Sunnybrook Health Sciences Centre<br>Evans, William ; Cancer Care Ontario<br>Peter, Alice; Cancer Care Ontario<br>Truscott, Rebecca ; Cancer Care Ontario<br>Chan, Kelvin; Sunnybrook Health Sciences Centre, |
| <b>Primary Subject Heading</b>: | Health economics                                                                                                                                                                                                                                                                                                                                                                                                                                                     |
| Secondary Subject Heading:      | Smoking and tobacco                                                                                                                                                                                                                                                                                                                                                                                                                                                  |
| Keywords:                       | Smoking, Healthcare costs, Health system costs, Cancer, Economic burden                                                                                                                                                                                                                                                                                                                                                                                              |
|                                 |                                                                                                                                                                                                                                                                                                                                                                                                                                                                      |

SCHOLARONE™  
Manuscripts

Impact of smoking on health system costs among cancer patients

# Impact of Smoking on Health System Costs among Cancer Patients in a retrospective cohort study in Ontario, Canada

Wanrudee Isaranuwachai<sup>1,3-5</sup>; Claire de Oliveira<sup>1,3,5,6</sup>; Nicole Mittmann<sup>1-3,7</sup>; William K. Evans<sup>2</sup>; Alice Peter<sup>2</sup>; Rebecca Truscott<sup>2</sup>; Kelvin Kar-Wing Chan<sup>1-3,5,7,8</sup>

1. Canadian Centre for Applied Research in Cancer Control, Cancer Care Ontario, Toronto, Ontario, Canada
2. Cancer Care Ontario, Toronto, Ontario, Canada
3. University of Toronto, Toronto, Ontario, Canada
4. St. Michael's Hospital, Toronto, Ontario, Canada
5. Institute for Clinical Evaluative Sciences, Toronto, Ontario, Canada
6. Centre for Addiction and Mental Health, Toronto, Ontario, Canada
7. Sunnybrook Research Institute, Toronto, Ontario, Canada
8. Sunnybrook Odette Cancer Centre, Toronto, Ontario, Canada

\*Correspondence to:

Wanrudee Isaranuwachai, PhD  
Research Scientist, Centre for Excellence in Economic Analysis Research, Li Ka Shing Knowledge Institute, St. Michael's Hospital  
Assistant Professor, Institute for Health Policy, Management & Evaluation, University of Toronto  
T: 416-864-6060 ext. 77074  
E: [isaranuwatcw@smh.ca](mailto:isaranuwatcw@smh.ca)  
W: [www.clear-healtheconomics.ca](http://www.clear-healtheconomics.ca) | [www.hubresearch.ca](http://www.hubresearch.ca)

Word count (main text): 3,417/4,000

Impact of smoking on health system costs among cancer patients

## 1 ABSTRACT

### 2 Objective

3 Smoking is the main modifiable cancer risk factor. The objective of this study was to examine  
4 the impact of smoking on health system costs among newly diagnosed adult cancer patients.  
5 Specifically, costs of cancer patients who were current smokers were compared with those of  
6 non-smokers from a publicly funded health system perspective.  
7

### 8 Methods

9 This population-based cohort study of cancer patients used administrative databases to identify  
10 smokers and non-smokers (1 April 2014 - 31 March 2016) and their health care costs in the 12-  
11 24 months following a cancer diagnosis. The health services included were hospitalizations,  
12 emergency room visits, drugs, home care services, and physician services (from time of  
13 diagnosis onwards). The difference in cost (i.e. incremental cost) between cancer patients who  
14 were smokers and those who were non-smokers was estimated using a generalized linear model  
15 (with log link and gamma distribution), and adjusted for age, sex, neighborhood income, rurality,  
16 cancer site, cancer stage, geographical region, and comorbidities.  
17

### 18 Results

19 This study identified 3,606 smokers and 14,911 non-smokers. Smokers were significantly  
20 younger (61 vs 65 years), more likely to be male (53%), lived in poorer neighborhoods, had  
21 more advanced cancer stage, and were more likely to die within one year of diagnosis, compared  
22 to non-smokers. The regression model revealed that on average, smokers had significantly higher  
23 monthly healthcare costs (\$5,091) than non-smokers (\$4,847),  $p < 0.05$ .  
24

### 25 Conclusions

26 Smoking status has a significant impact on healthcare costs among cancer patients. On average,  
27 smokers incurred higher healthcare costs than non-smokers. These findings provide a further  
28 rationale for efforts to introduce evidence-based smoking cessation programs as a standard of  
29 care for cancer patients as they have the potential to not only improve patients' outcomes but  
30 also to reduce the economic burden of smoking on the healthcare system.  
31

### 32 Keywords:

33 Smoking; Healthcare costs; Health system costs; Cancer; Economic burden

## Impact of smoking on health system costs among cancer patients

**Strengths and Limitations of this study**

- Findings from this study represent one piece of evidence in support of the integration of smoking cessation programs into cancer care treatment plans as a standard of practice
- This study adds to the literature by providing up-to-date and precise health care cost estimates of smoking using existing administrative person-level costing approaches
- A limitation of this study is that it excludes a subset of relevant variables that may have had an influence on health outcomes and cost due to the nature of the study design (e.g., type of tumour, amount and duration of smoking)
- This study focused on the cost incurred to the public healthcare payer and, therefore, indirect costs were not considered but could be explored in future research
- The findings from this study should motivate policy makers to design, implement, and fund smoking cessation programs, which have the potential not only to improve patients' treatment outcomes but also to reduce the economic burden of smoking on the healthcare system



Impact of smoking on health system costs among cancer patients

## 1 INTRODUCTION

2 Cancer care is a substantial component of health care expenditures of developed  
3 countries.(1-3) In Canada, the economic burden of cancer was estimated to be \$7.5 billion in  
4 2012.(4) It is well recognized that smoking is the main modifiable risk factor for cancer (5) and it  
5 is estimated that it contributes to approximately 30% of all cancer deaths.(6, 7) Smoking can also  
6 harm directly or indirectly almost every organ of the body and is responsible for a number of  
7 other chronic diseases that contribute to higher health care costs.(5, 8-11) Quitting smoking after  
8 a diagnosis of cancer has been associated with improved general health, better quality of life,  
9 reduced toxicity, greater response to treatment (such as radiation therapy), and decreased risk of  
10 disease recurrence and second primary cancers.(12-18) Nevertheless, cancer patients are just as  
11 likely to smoke as the general public with the smoking rate being approximately 20%.(19)  
12 Furthermore, smoking cessation programs are rare in oncology settings.(12, 13, 20)

13 Although the impact of smoking on healthcare costs has been examined in the general  
14 population, there is very little information on the impact of smoking on the cost of cancer care in  
15 patients who are smokers compared to those who are not.

16 The study objective was to compare the health system costs of cancer patients who were  
17 current smokers with those of non-smokers between 2014 and 2016, from the perspective of a  
18 public healthcare payer, using administrative databases in Ontario, Canada. We hypothesized  
19 that smoking would be associated with higher overall health system costs as a result of the need  
20 to manage more frequent and severe toxicities of treatment, more frequent disease recurrence, as  
21 well as more non-cancer related morbidities. Understanding the cost burden of smokers with  
22 cancer may help drive policy change by providing an economic argument for investing in  
23 cessation resources and programs for cancer patients who smoke.

## 25 MATERIALS AND METHODS

26 This study was a secondary data analysis using existing administrative databases at  
27 Cancer Care Ontario (CCO) and the Institute for Clinical Evaluative Sciences (ICES), both  
28 located in Toronto, Ontario, Canada. Research ethics approval was obtained from St. Michael's  
29 Hospital, Toronto, Ontario, Canada.

### 30 Study population and setting

31 The study population consisted of newly diagnosed adult cancer patients, aged  $\geq 18$  years,  
32 who received ambulatory care from one of the 14 Regional Cancer Centres (RCCs) in Ontario,  
33 Canada, between 1 April 2014 and 31 March 2015. The Ontario Cancer Registry (OCR) was  
34 used to identify our study population. We excluded patients with: 1) an invalid health card (i.e.,  
35 who were not eligible for public health care insurance); 2) an invalid death date (i.e., where death  
36 date was on or before the date of diagnosis); 3) missing data on smoking status; 4) a cancer stage  
37 of zero; 5) missing data on neighborhood-level income, geographical location, or rurality of  
38 residence; 6) lost health care coverage during the follow-up time; or 7) had multiple cancers.  
39 Each patient was followed until death or the end of the observation period (31 March 2016),

## Impact of smoking on health system costs among cancer patients

1  
2  
3 1 whichever came first. S1 Appendix provides a flow diagram of the number of patients excluded  
4 2 from the analysis.  
5

### 3 **Study population sub-groups (smokers and non-smokers)**

4 The study population of cancer patients was divided into those who were identified as  
5 smokers and non-smokers. Cancer patients who were either currently smoking at the time of  
6 diagnosis or who had smoked in the previous 6 months of their first ambulatory care visit were  
7 identified as *smokers*, whereas all others were identified as *non-smokers*. Information on *smoking*  
8 *status* was obtained from the *CCO Smoking Cessation Dataset (CCOSCD)*, which is part of the  
9 Activity Level Reporting (ALR) database housed at CCO. The CCOSCD collects information on  
10 the self-reported smoking status of newly diagnosed ambulatory cancer patients, whether the  
11 current smoker has been advised to quit, and whether the patient has been referred for smoking  
12 cessation counselling and/or pharmacotherapy.<sup>(21)</sup> Each RCC submits the data on these metrics  
13 on a monthly basis to CCO as part of CCO's Smoking Cessation Program. S2 Appendix describes  
14 the data elements in the dataset and their definitions.  
15

### 16 **Data sources and variables**

17 A number of databases were used to obtain healthcare utilization data: the ALR database,  
18 the New Drug Funding Program (NDFP) database, the Ontario Drug Benefit (ODB) claims  
19 database, the Discharge Abstract Database (DAD) obtained from the Canadian Institute for  
20 Health Information (CIHI), the National Ambulatory Care Reporting System (NACRS) obtained  
21 from CIHI, the Ontario Health Insurance Program (OHIP) claims database, the Home Care  
22 Database (HCD), the Continuing Care Reporting System (CCRS), and the National  
23 Rehabilitation Reporting System (NRS). Table 1 provides a brief description of each database.  
24

25 **Table 1. Administrative databases used in the analysis**

| Database | Description                                                                                                                                                                                                                                                                                                                                                                                                                                                                                                                |
|----------|----------------------------------------------------------------------------------------------------------------------------------------------------------------------------------------------------------------------------------------------------------------------------------------------------------------------------------------------------------------------------------------------------------------------------------------------------------------------------------------------------------------------------|
| OCR      | The Ontario Cancer Registry is the largest population-based cancer registry in Canada. The OCR contains over 300 fields, including primary site of cancer, county of residence at diagnosis and health insurance number.                                                                                                                                                                                                                                                                                                   |
| ALR      | The Ontario Activity Level Reporting provides a set of data elements from selected Ontario Cancer Centers that cannot be obtained from other providers. This information is used to support management decision making process.                                                                                                                                                                                                                                                                                            |
| NDFP     | The New Drug Funding Program data are used for reimbursement decisions and to support cancer system planning for systemic therapy. To be eligible for reimbursement through the NDFP, hospitals must submit eligibility/enrolment data and treatment data in compliance with monthly billing deadlines. For treatment reimbursement, each patient must be enrolled in the NDFP by providing eligibility/enrolment data that include patient-specific demographic information and answers to a series of medical questions. |
| ODB      | The Ontario Drug Benefit Formulary lists prescription drugs that are covered for patients over 65 years, and selected other groups (e.g., those that require income supports).                                                                                                                                                                                                                                                                                                                                             |
| CIHI DAD | Hospitalization and comorbidity data are in the Discharge Abstract Database from                                                                                                                                                                                                                                                                                                                                                                                                                                           |

## Impact of smoking on health system costs among cancer patients

|               |                                                                                                                   |
|---------------|-------------------------------------------------------------------------------------------------------------------|
|               | the Canadian Institute for Health Information.                                                                    |
| CIHI<br>NACRS | Emergency room visits and same day surgery data were obtained from the National Ambulatory Care Reporting System. |
| OHIP          | Ontario Health Insurance Program reports outpatient physician visits based on fee-for-service claims.             |
| HCD           | Home Care Database captures all home care services in Ontario.                                                    |
| CCRS          | The Continuing Care Reporting System reports utilization of continuing care.                                      |
| NRS           | National Rehabilitation Reporting System captures rehabilitation utilization.                                     |

*Healthcare costs*

The outcome of interest for the study was total and disaggregated healthcare costs from the perspective of the Ontario Ministry of Health and Long-Term Care (MOHLTC) from the time of diagnosis. From this perspective and given that patients in the study setting receive publicly funded health care insurance, cancer patients did not have to pay for health services. Healthcare costs included costs associated with hospitalizations, same-day surgeries, emergency room (ER) visits, outpatient prescription drugs, rehabilitation, complex continuing care, home care services, physician services, and laboratory and diagnostic tests. Cost estimates were derived using an existing costing algorithm at ICES. For example, hospitalizations and ER visit costs were estimated by multiplying a resource intensity weight (measure of utilization) with an average cost per hospital stay or ER visit (unit cost).(22) Physician visit costs were obtained from the Ontario Schedule of Benefits for Physician Services.(23) Additional details on the methods to estimate cost can be found elsewhere.(4, 22, 24) Costs were adjusted to 2016 Canadian dollars (CAD) using the health component of the Consumer Price Index in health care category (1 CAD = approximately 0.78 US dollars).(25)

*Other variables*

Due to potential differences between smokers and non-smokers, we controlled for patient characteristics by adjusting for a number of variables such as age at diagnosis, sex, cancer site, cancer stage (where available), geographical location of residence (i.e., rurality and Local Health Integration Network (LHIN)), neighborhood income quintile, and comorbidity (measured by the Adjusted Clinical Groups® or ACG®), all of which were obtained from the previously mentioned databases. In Ontario, publicly funded health care services are administered on a regional basis by the LHINs, which serve as the regional health authority. Each of the 14 LHINs is responsible for a distinct geographical location.(26) The ACG® system is a patient case-mix adjustment system used to measure health status by grouping diagnoses into clinical groups. The goal of this system is to assign each patient a single value, which represents the patient's comorbidity through his/her expected or actual use of health services, where a higher number refers to a greater number of comorbidities (0-4, 5-6, 7-9, and 10+).(27) In this study, this value was assigned at the time of the cancer diagnosis. Cancer sites or groupings were reported on as follows: bladder; bronchus and lung; breast; colorectal; corpus uteri; head and neck; prostate; melanoma; and "other". Other included anus and anal canal, brain, esophagus, hematopoietic, liver, ovary, pancreas, renal, stomach, testis, and thyroid. The extent of cancer was reported in one of 3 groups: stage 1-2; stage 3-4; and unknown stage. Cancer stage data in Ontario were available predominantly for the main types of cancer (e.g., lung, breast, prostate and colorectal); therefore, we have created a separate category for unknown cancer stage.

## Impact of smoking on health system costs among cancer patients

## Analysis

The raw costs for non-smokers and smokers were reported descriptively. To adjust for different follow up times, as some patients (particularly smokers) have a greater chance of dying than non-smokers, we estimated person-month costs.(28)

The output of the economic analysis was the incremental cost (reported in 2016 CAD) between cancer patients who smoked and those who did not. We analyzed our dependent variable (monthly healthcare costs) using regression models to estimate the difference in expected health care cost between the two groups using recycled predictive methods,(28-30) as described in the following equation:

$$Cost_i = \beta_0 + \beta_1(smoking\ status)_i + \beta_2(age)_i + \beta_3(sex)_i + \beta_4(income\ quintile)_i + \beta_5(rurality)_i + \beta_6(cancer\ stage)_i + \beta_7(cancer\ type)_i + \beta_8(LHIN)_i + \epsilon_i$$

where  $cost_i$  represents a monthly cost of patient  $i$ ,  $\beta_x$  refers to a coefficient estimate of each variable,  $X$ , such as smoking status, age, and sex and  $\epsilon$  represents the error term. The smoking status variable was the primary independent variable, and the regression model was adjusted for potential confounding variables, such as age, sex, income, rurality, cancer stage, cancer site, geographical region (LHIN), and comorbidity. To accommodate for the skewness of cost data, a generalized linear model with log link and gamma family was used to estimate the incremental cost between smokers and non-smokers.(28, 31) We also conducted a Modified Park test to ensure that our selected model was the best fit.(28, 32) Collinearity was also explored using Variance Inflation Factor, and we found no evidence of collinearity. S3 Appendix reports a completed STROBE statement, a checklist of items that should be included in reports of cohort studies.

## Patient and public involvement

There was no involvement of patients during the study period but there are knowledge translation activities with various knowledge users.

## RESULTS

There were 3,606 smokers and 14,911 non-smokers in our study cohort (see Table 2). Cancer patients who smoked were significantly younger (61 vs 65 years), more likely to be male (53% vs 45%), live in lower income neighborhoods (25% of smokers compared to 16% of non-smokers were in the lowest income quintile), and more likely to live in rural areas (18% vs 15%) compared to cancer patients who were non-smokers. Cancer stage data was available for approximately 70% of patients over the study period. Of those with available cancer stage data, smokers were more likely to have advanced cancer stages than non-smokers. Almost 40% of smokers were in stage 3-4 compared to approximately 27% of non-smokers. Roughly 25% of smokers died within 1 year of diagnosis compared to 15% of non-smokers who died over the

## Impact of smoking on health system costs among cancer patients

1 same follow-up period. Approximately 30% of smokers were in the lowest comorbidity level (0-  
 2 4) compared to 24% of non-smokers. Only 19% of smokers were in the highest comorbidity  
 3 level (10+) compared to 23% of non-smokers. Among the main cancer types, lung cancer was  
 4 the most common type of cancer among smokers followed by breast cancer. For non-smokers,  
 5 the most common cancer type was breast cancer followed by prostate cancer and lung cancer  
 6 (Table 2).

7  
 8 **Table 2. Demographic characteristics of study population between smokers and non-**  
 9 **smokers**

| Variable*                              | Non-smokers        | Smokers            |
|----------------------------------------|--------------------|--------------------|
| N                                      | 14,911             | 3,606              |
| Mean age in years (SD)                 | 65.1 (13.6)        | 60.6 (12.1)        |
| Male                                   | 6,681 (44.8%)      | 1,907 (52.9%)      |
| Age groups in years, N (%)             |                    |                    |
| 18-44                                  | 1,116 (7.5%)       | 310 (8.6%)         |
| 45-54                                  | 1,973 (13.2%)      | 661 (18.3%)        |
| 55-64                                  | 3,443 (23.1%)      | 1,217 (33.7%)      |
| 65-74                                  | 4,525 (30.3%)      | 1,035 (28.7%)      |
| 75+                                    | 3,854 (25.8%)      | 383 (10.6%)        |
| Income quintile, N (%)                 |                    |                    |
| 1 (lowest)                             | 2,387 (16.0%)      | 887 (24.5%)        |
| 2                                      | 2,597 (17.4%)      | 818 (22.7%)        |
| 3                                      | 3,065 (20.6%)      | 691 (19.2%)        |
| 4                                      | 3,351 (22.5%)      | 649 (18.0%)        |
| 5 (highest)                            | 3,511 (23.5%)      | 561 (15.6%)        |
| Living in rural areas, N (%)           | 2,267 (15.2%)      | 662 (18.4%)        |
| Death within 1 year, N (%)             | 2,211 (14.8%)      | 850 (23.6%)        |
| Mean time from diagnosis to death (SD) | 255.2 days (163.3) | 236.8 days (159.6) |
| Comorbidity (ACG), N (%)               |                    |                    |
| 0-4                                    | 3,589 (24.1%)      | 1,092 (30.3%)      |
| 5-6                                    | 3,295 (22.1%)      | 838 (23.2%)        |
| 7-9                                    | 4,533 (30.4%)      | 985 (27.3%)        |
| 10+                                    | 3,494 (23.4%)      | 691 (19.2%)        |
| Cancer stage, N (%)                    |                    |                    |
| 1-2                                    | 6,378 (42.8%)      | 1,289 (35.7%)      |
| 3-4                                    | 3,958 (26.5%)      | 1,392 (38.6%)      |
| Unknown                                | 4,575 (30.7%)      | 925 (25.7%)        |
| Main cancer types, N (%)               |                    |                    |
| Lung                                   | 1,673 (11.2%)      | 1,017 (28.2%)      |
| Breast                                 | 3,088 (20.7%)      | 497 (13.8%)        |
| Head and neck                          | 614 (4.1%)         | 292 (8.1%)         |
| Prostate                               | 1,694 (11.4%)      | 290 (8.0%)         |
| Colorectal                             | 1,460 (9.8%)       | 268 (7.4%)         |
| Melanoma                               | 563 (3.8%)         | 81 (2.2%)          |

## Impact of smoking on health system costs among cancer patients

|              |               |               |
|--------------|---------------|---------------|
| Corpus uteri | 701 (4.7%)    | 64 (1.8%)     |
| Bladder      | 196 (1.3%)    | 43 (1.2%)     |
| Other        | 4,922 (33.0%) | 1,054 (29.3%) |

Legend: ACG= Adjusted Clinical Groups®; N = sample size; SD = standard deviation.

Note: \* the two groups were significantly different across all variables ( $p < 0.05$ ).

S4 Appendix reports the unadjusted monthly healthcare costs between the study groups. Generally, smokers incurred higher healthcare costs than non-smokers for hospitalizations, physician services, ER visits, home care services, and complex continuing care. Focusing on specific types of healthcare costs, smokers had approximately 30% higher hospitalization costs, 43% higher ER visit costs, 23% higher physician visit costs, and 30% higher home care costs than non-smokers. Overall, total monthly health care costs were higher among smokers (\$5,649  $\pm$  \$7,169) than non-smokers (\$4,704  $\pm$  \$6,737).

From the adjusted regression model (controlling for age, sex, income, rurality, stage, disease site, geographical region, and comorbidity), on average, smokers had significantly higher monthly healthcare costs (\$5,091) than non-smokers (\$4,847). Smokers incurred \$244 ( $\pm$  113; interquartile range \$145 to \$328) more in healthcare cost per month, or \$2,928 more per year than non-smokers,  $p=0.0047$ .

## DISCUSSION

Understanding the impact of smoking on the healthcare costs of cancer patients may strengthen the rationale for decision makers to further invest in smoking cessation programs. It is generally understood that smoking can lead to worse clinical outcomes, but there is a paucity of literature on the impact of smoking on healthcare costs among cancer patients. The findings from this analysis are aligned with the limited available literature. Specifically, we found that cancer patients who were smokers were younger and more commonly males compared to cancer patients who were not smokers, which is in line with the literature.<sup>(10, 33)</sup> Additionally, smokers had, on average, almost 20% higher total monthly healthcare costs than non-smokers. When focusing mainly on hospitalizations, the incremental cost due to smoking was approximately 30% higher than non-smokers, in contrast to an increase of up to 50% in incremental hospitalization costs among smokers reported in the literature.<sup>(9, 34)</sup> Our findings suggest that cancer patients who are smokers are responsible for a greater economic burden than non-smokers.

Evidence on the importance of smoking cessation for cancer patients has strengthened in recent years. Several cancer care institutions in the United States have emerged as leaders in this field by incorporating smoking cessation programs into practice.<sup>(35)</sup> Ontario is the first jurisdiction in North America to implement a systematic smoking cessation program in all of its RCCs. Under the leadership of CCO, the provincial agency responsible for improving the quality of cancer services in Ontario, a smoking cessation program provides support for new ambulatory cancer patients by screening patients for tobacco use, advising on the benefits of quitting, and offering referrals to smoking cessation resources. Understanding the impact of smoking on the healthcare costs incurred by cancer patients may further strengthen the rationale for the program

## Impact of smoking on health system costs among cancer patients

1  
2  
3 1 and encourage policy makers (e.g., public healthcare payer) to invest in smoking cessation  
4 2 programs. The findings from this study may also be beneficial to other cancer agencies, and not-  
5 3 for-profit organizations (e.g., American Cancer Society, Worldwide Cancer Research, and  
6 4 Canadian Partnership Against Cancer) engaged in developing smoking cessation policies and  
7 5 implementing smoking cessation programs. In addition, this study may help to inform the  
8 6 general public about the burden of smoking among cancer patients and motivate hospital and  
9 7 health system administrators about the incremental economic impact of failing to help cancer  
10 8 patients quit smoking. The findings from this study represent a further piece of evidence in  
11 9 support of the integration of smoking cessation programs into cancer care treatment plans (in  
12 10 settings similar to the study setting) and will hopefully stimulate further research into the optimal  
13 11 implementation of smoking cessation programs in order to improve cancer care outcomes and  
14 12 reduce morbidity, mortality, and cost.

15 13 This study has strengths and limitations, which should be highlighted. The medical  
16 14 literature has called for more up-to-date and precise health care cost estimates of smoking.<sup>(9, 36)</sup>  
17 15 Existing Canadian literature has used cost estimates for smokers from the 1990s and/or  
18 16 employed high-level costing approaches, instead of using patient-level cost estimates. These  
19 17 prior estimates might not accurately reflect the true healthcare cost difference between smokers  
20 18 and non-smokers.<sup>(9, 36-38)</sup> This study represents a first step in systematically collecting these  
21 19 data and linking them to data on system-level resources. Furthermore, using existing data from  
22 20 administration databases, we were able to conduct the analysis with adjustment of potential  
23 21 confounders to increase the validity of the findings.

24 22 In terms of limitations, data on smoking status were limited to one assessment during the  
25 23 initial consultation period (28 days) for new ambulatory cancer patients. Therefore, it is possible  
26 24 that patients may have changed their smoking status after their cancer diagnosis but data on  
27 25 change in smoking status were not captured. Our analysis followed the intent-to-treat principle  
28 26 and was applied to both study groups (i.e., smokers at the time of diagnosis or who had quit in  
29 27 the last six months remained smokers throughout the analysis and vice versa). If some “smokers”  
30 28 quit smoking, their medical outcomes or tolerance to treatment may have been better than that of  
31 29 persistent smokers (presumably with less resource utilization and less cost). Consequently, this  
32 30 analysis may have provided a lower bound of the incremental cost. Individuals who had quit  
33 31 prior to 6 months would likely still have more health complications and resource utilization than  
34 32 life-long non-smokers. Classification of these patients as non-smokers may again lead to the  
35 33 possibility of an underestimation of the difference in cost between smokers and non-smokers.  
36 34 The data available on smoking status limited our ability to analyze former smokers and recent  
37 35 quitters as separate groups.

38 36 Our analysis was also limited by the available follow-up data. As the follow-up period  
39 37 was relatively short, it is possible that significant differences might be observed with a longer  
40 38 period of follow-up. It is also possible that, given the nature of the study design, relevant  
41 39 variables were not collected. For example, cancer stage data were available for the main types of  
42 40 cancer (i.e., lung, breast, colorectal, and prostate cancer), but not for some other tumour types,  
43 41 such as head and neck cancer. In addition to the main tumour types, our study included other less  
44 42 common tumour types (e.g., brain, liver) but their smaller numbers did not allow us to examine  
45 43 them separately. This could be a future area of research. Patients with multiple cancers were  
46 44 excluded from the study to distinguish the impact of smoking on a single tumour type. In  
47 45 addition, there were no data available on the amount or duration of smoking, which would likely  
48 46 have an influence on health outcomes and cost. Smoking has been shown to increase both direct

## Impact of smoking on health system costs among cancer patients

1  
2  
3 1 and indirect costs.(9, 37, 38) However, because our study used administrative data, indirect costs  
4 2 were not explored. Finally, the cost to implement a smoking cessation program was not included  
5 3 in this analysis, and may cancel out some of the economic benefits of helping smokers to stop  
6 4 smoking.

7 5 In conclusion, cancer patient smoking status has a significant impact on health system  
8 6 costs. On average, smokers incurred higher healthcare costs than non-smokers. These findings  
9 7 provide an additional reason for the introduction of evidence-based smoking cessation programs  
10 8 for cancer patients. The findings from this study should motivate policy makers to fund, design,  
11 9 and implement smoking cessation programs, which have the potential not only to improve  
12 10 patients' treatment outcomes but also to reduce the economic burden of smoking on the  
13 11 healthcare system.

14  
15  
16  
17  
18  
19  
20  
21  
22  
23  
24  
25  
26  
27  
28  
29  
30  
31  
32  
33  
34  
35  
36  
37  
38  
39  
40  
41  
42  
43  
44  
45  
46  
47  
48  
49  
50  
51  
52  
53  
54  
55  
56  
57  
58  
59  
60

For peer review only



Impact of smoking on health system costs among cancer patients

## Abbreviations

|        |                                                        |
|--------|--------------------------------------------------------|
| ACG®   | Adjusted Clinical Groups®                              |
| ARCC   | Canadian Centre for Applied Research in Cancer Control |
| CAD    | Canadian dollars                                       |
| CCO    | Cancer Care Ontario                                    |
| CCOSCD | CCO Smoking Cessation Dataset                          |
| ER     | emergency room                                         |
| ICES   | Institute for Clinical Evaluative Sciences             |
| LHIN   | Local Health Integration Network                       |
| MOHLTC | Ontario Ministry of Health and Long-Term Care          |
| RCCs   | Regional Cancer Centres                                |

## Acknowledgments

We would like to acknowledge the assistance of Refik Saskin and Lisa Ellison from the Institute for Clinical Evaluative Sciences, and Stephanie Young, Mohammad Hoque, Elisa Candido, Julie Klein-Geltink, Brooke Filsinger, the CCO Research Office, and the Data Disclosure Committee from Cancer Care Ontario including Ashna Jinah and Dr. Deena from St. Michael's Hospital for preparation of submission.

This study made use of de-identified data from the ICES Data Repository, which is managed by the Institute for Clinical Evaluative Sciences with support from its funders and partners: Canada's Strategy for Patient-Oriented Research (SPOR), the Ontario SPOR Support Unit, the Canadian Institutes of Health Research and the Government of Ontario. The opinions, results and conclusions reported are those of the authors. No endorsement by ICES or any of its funders or partners is intended or should be inferred. Parts of this material are based on data and/or information compiled and provided by CIHI. However, the analyses, conclusions, opinions and statements expressed in the material are those of the author(s), and not necessarily those of CIHI. Parts of this material are based on data and information provided by Cancer Care Ontario (CCO). The opinions, results, view, and conclusions reported in this paper are those of the authors only.

1 Impact of smoking on health system costs among cancer patients  
2

### 3 **Contributors** 4

5 All authors made important contributions to this work.

6 WI, CdO, NM, WE, AP, RT, KKWC contributed to this study's conception and design.

7 WI, NM, AP, RT were responsible for data collection and assembly.

8 All authors (WI, CdO, NM, WE, AP, RT, KKWC) were involved in data analysis and  
9 interpretation.

10 WI, CdO, NM, WE drafted the paper, and all authors critically reviewed and suggested  
11 amendments prior to submission.

12 The corresponding author attests that all listed authors meet authorship criteria and that others  
13 not meeting the criteria have been omitted.

### 14 **Funding:** 15

16 This work was funded by the Canadian Centre for Applied Research in Cancer Control (ARCC).  
17 ARCC receives core funding from the Canadian Cancer Society Research Institute (Grant #:  
18 2015-703549).  
19

### 20 **Competing interests:** 21

22 All authors have completed the ICMJE uniform disclosure form at  
23 [www.icmje.org/coi\\_disclosure.pdf](http://www.icmje.org/coi_disclosure.pdf) and declare: no support from any organization for the  
24 submitted work; no financial relationships with any organizations that might have an interest in  
25 the submitted work in the previous three years; no other relationships or activities that could  
26 appear to have influenced the submitted work.  
27

### 28 **Ethics approval:** 29

30 Research ethics approval was obtained from St. Michael's Hospital, Toronto, Ontario, Canada.  
31

### 32 **Data sharing statement:** 33

34 This study made use of de-identified data from the Institute for Clinical Evaluative Sciences and  
35 Cancer Care Ontario who have the right and control over the data used.  
36

### 37 **Supporting Information** 38

39 S1 Appendix: Flow diagram on the number of excluded patients  
40  
41  
42  
43  
44  
45  
46  
47  
48  
49  
50  
51

1 Impact of smoking on health system costs among cancer patients  
2

3 S2Appendix: Data elements and their definition of Cancer Care Ontario's Smoking Cessation  
4 Dataset (PDF)  
5

6 S3 Appendix: Completed STROBE statement, a checklist of items that should be included in  
7 reports of cohort studies  
8

9  
10 S4 Appendix: Unadjusted monthly healthcare costs between cancer patients who were smokers  
11 and non-smokers (2016 CAD)  
12  
13  
14  
15  
16  
17  
18  
19  
20  
21  
22  
23  
24  
25  
26  
27  
28  
29  
30  
31  
32  
33  
34  
35  
36  
37  
38  
39  
40  
41  
42  
43  
44  
45  
46  
47  
48  
49  
50  
51  
52  
53  
54  
55  
56  
57  
58  
59  
60

For peer review only

## REFERENCES

1. Kesselheim AS, Avorn J, Sarpatwari A. The High cost of prescription drugs in the United States: origins and prospects for reform. *JAMA*. 2016;316(8):858-71.
2. Vogler S, Vitry A. Cancer drugs in 16 European countries, Australia, and New Zealand: a cross-country price comparison study. *The Lancet Oncology*. 2016;17(1):39-47.
3. Canadian Cancer Society. Nearly 1 in 2 Canadians expected to get cancer: report 2017 [Available from: <http://www.cancer.ca/en/about-us/for-media/media-releases/national/2017/canadian-cancer-statistics/?region=bc>].
4. de Oliveira C, Weir S, Rangrej J, Krahn MD, Mittmann N, Hoch JS, et al. The economic burden of cancer care in Canada: a population-based cost study. *CMAJ open*. 2018;6(1):E1-E10.
5. Cancer Care Ontario. Cancer Risk Factors in Ontario: Tobacco. 2014.
6. American Cancer Society. Tobacco-related cancers fact sheet 2014 [cited 2014]. Available from: <http://www.cancer.org/cancer/cancercauses/tobaccocancer/tobacco-related-cancer-fact-sheet>.
7. Anand P, Kunnumakkara AB, Sundaram C, Harikumar KB, Tharakan ST, Lai OS, et al. Cancer is a preventable disease that requires major lifestyle changes. *Pharmaceutical Research* 2008;25(9):2097-116.
8. Zimovetz EA, Wilson K, Samuel M, Beard SM. A review of cost-effectiveness of varenicline and comparison of cost-effectiveness of treatments for major smoking-related morbidities. *Journal of Evaluation in Clinical Practice*. 2011;17(2):288-97.
9. Sari AA, Rezaei S, Arab M, Majdzadeh R, Matin BK, Zandian H. Effects of Smoking on Cost of Hospitalization and Length of Stay among Patients with Lung Cancer in Iran: a Hospital-Based Study. *Asian Pacific journal of cancer prevention: APJCP*. 2016;17(9):4421-6.
10. Sherratt F, Field J, Marcus M. Association between smoking and health outcomes in an economically deprived population: the Liverpool Lung Project. *J Epidemiol Community Health*. 2017;jech-2016-208730.
11. U.S. Department of Health and Human Services. The Health Consequences of Smoking: 50 Year of Progress. A Report of the Surgeon General. Atlanta, GA: U.S. Department of Health and Human Services, Centers for Disease Control and Prevention, National Center for Chronic Disease Prevention and Health Promotion, Office on Smoking and Health; 2014.
12. Toll BA, Brandon TH, Gritz ER, Warren GW, Herbst RS. Assessing tobacco use by cancer patients and facilitating cessation: an American Association for Cancer Research policy statement. *Clin Cancer Res*. 2013;19(8):1941-8.
13. Nayan S, Gupta MK, Strychowsky JE, Sommer DD. Smoking cessation interventions and cessation rates in the oncology population: an updated systematic review and meta-analysis. *Otolaryngol Head Neck Surg*. 2013;149(2):200-11.
14. Cancer Care Ontario. Cancer Fact: Reported tobacco screening increases among new cancer patients 2017 [Available from: [www.cancercareontario.ca/cancerfacts](http://www.cancercareontario.ca/cancerfacts)].
15. Dobson Amato KA, Hyland A, Reed R, Mahoney MC, Marshall J, Giovino G, et al. Tobacco Cessation May Improve Lung Cancer Patient Survival. *Journal of thoracic oncology : official publication of the International Association for the Study of Lung Cancer*. 2015;10(7):1014-9.
16. Gritz ER, Toll BA, Warren GW. Tobacco use in the oncology setting: advancing clinical practice and research. *Cancer Epidemiol Biomarkers Prev*. 2014;23(1):3-9.

## Impact of smoking on health system costs among cancer patients

17. Warren GW, Marshall JR, Cummings KM, Zevon MA, Reed R, Hysert P, et al. Automated tobacco assessment and cessation support for cancer patients. *Cancer*. 2014;120(4):562-9.
18. Warren GW, Sobus S, Gritz ER. The biological and clinical effects of smoking by patients with cancer and strategies to implement evidence-based tobacco cessation support. *Lancet Oncol*. 2014;15(12):e568-80.
19. Statistics Canada. Current smoking trends 2015 [Available from: <https://www.statcan.gc.ca/pub/82-624-x/2012001/article/11676-eng.htm>].
20. Tota JE, Ramanakumar AV, Franco EL. Lung cancer screening: review and performance comparison under different risk scenarios. *Lung*. 2014;192(1):55-63.
21. Cancer Care Ontario. Cancer Care Ontario's Data Book - 2016-2017. 2016 [updated September 2016]. Available from: <https://cancercare.on.ca/ext/databook/db1516/>.
22. Guidelines on person-level costing using administrative databases in Ontario [Internet]. 2013. Available from: [http://www.hsprn.ca/uploads/files/Guidelines\\_on\\_PersonLevel\\_Costing\\_May\\_2013.pdf](http://www.hsprn.ca/uploads/files/Guidelines_on_PersonLevel_Costing_May_2013.pdf).
23. Ontario Ministry of Health and Long-Term Care. Schedule of Benefits: Physician Services under the Health Insurance Act 2015 [Available from: [http://www.health.gov.on.ca/en/pro/programs/ohip/sob/physerv/sob\\_master20151221.pdf](http://www.health.gov.on.ca/en/pro/programs/ohip/sob/physerv/sob_master20151221.pdf)].
24. Thein HH, Isaranuwatthai W, Campitelli MA, Feld JJ, Yoshida E, Sherman M, et al. Health care costs associated with hepatocellular carcinoma: A population-based study. *Hepatology*. 2013;58(4):1375-84.
25. Statistics Canada. Consumer Price Index (CPI) 2017 [Available from: <http://www5.statcan.gc.ca/cansim/a26?lang=eng&retrLang=eng&id=3260020&paSer=&pattern=&stByVal=1&p1=1&p2=37&tabMode=dataTable&csid=>].
26. Ontario Ministry of Health and Long-Term Care. Ontario's LHINs 2017 [Available from: <http://www.lhins.on.ca/>].
27. University of Manitoba. Concept: Adjusted Clinical Groups(R) (ACG(R)) - Overview 2015 [Available from: <http://mchp-appserv.cpe.umanitoba.ca/viewConcept.php?printer=Y&conceptID=1304>].
28. Glick HA, Doshi JA, Sonnad SS, Polsky D. *Economic evaluation in clinical trials*: OUP Oxford; 2014.
29. Brown ML, Riley GF, Potosky AL, Etzioni RD. Obtaining long-term disease specific costs of care: application to Medicare enrollees diagnosed with colorectal cancer. *Med Care*. 1999;37(12):1249-59.
30. Taplin SH, Barlow W, Urban N, Mandelson MT, Timlin DJ, Ichikawa L, et al. Stage, age, comorbidity, and direct costs of colon, prostate, and breast cancer care. *J Natl Cancer Inst*. 1995;87(6):417-26.
31. Barber J, Thompson S. Multiple regression of cost data: use of generalised linear models. *Journal of health services research & policy*. 2004;9(4):197-204.
32. Barber J, Thompson S. Multiple regression of cost data: use of generalised linear models. *J Health Serv Res Policy*. 2004;9(4):197-204.
33. Rezaei S, Karami Matin B, Hajizadeh M, Baziyar M, Akbari Sari A. Economic burden of smoking in Iran: A prevalence-based annual cost approach. *Asian Pacific Journal of Cancer Prevention*. 2017;18(10):2867-73.

## Impact of smoking on health system costs among cancer patients

- 1  
2  
3 34. Husaini BA, Levine RS, Lammers P, Hull P, Novotny M, Moonis M. Smoking,  
4 depression, and hospital costs of respiratory cancers: Examining race and sex variation. *Family*  
5 *Medicine and Community Health*. 2017;5(1):29-42.  
6  
7 35. Raymakers AJN, Mayo J, Lam S, FitzGerald JM, Whitehurst DGT, Lynd LD. Cost-  
8 Effectiveness Analyses of Lung Cancer Screening Strategies Using Low-Dose Computed  
9 Tomography: A Systematic Review. *Applied Health Economics and Health Policy*.  
10 2016;14(4):409-18.  
11 36. Feirman SP, Glasser AM, Teplitzskaya L, Holtgrave DR, Abrams DB, Niaura RS, et al.  
12 Medical costs and quality-adjusted life years associated with smoking: a systematic review.  
13 *BMC public health*. 2016;16:646.  
14 37. Krueger H, Turner D, Krueger J, Ready AE. The economic benefits of risk factor  
15 reduction in Canada: tobacco smoking, excess weight and physical inactivity. *Can J Public*  
16 *Health*. 2014;105(1):e69-e78.  
17 38. Krueger J. Variation across Canada in the economic burden attributable to excess weight,  
18 tobacco smoking and physical inactivity. *Canadian Journal of Public Health*. 2015;106(4):E171.  
19  
20  
21  
22  
23  
24  
25  
26  
27  
28  
29  
30  
31  
32  
33  
34  
35  
36  
37  
38  
39  
40  
41  
42  
43  
44  
45  
46  
47  
48  
49  
50  
51  
52  
53  
54  
55  
56  
57  
58  
59  
60

## S1 Appendix: Flow diagram on the number of excluded patients

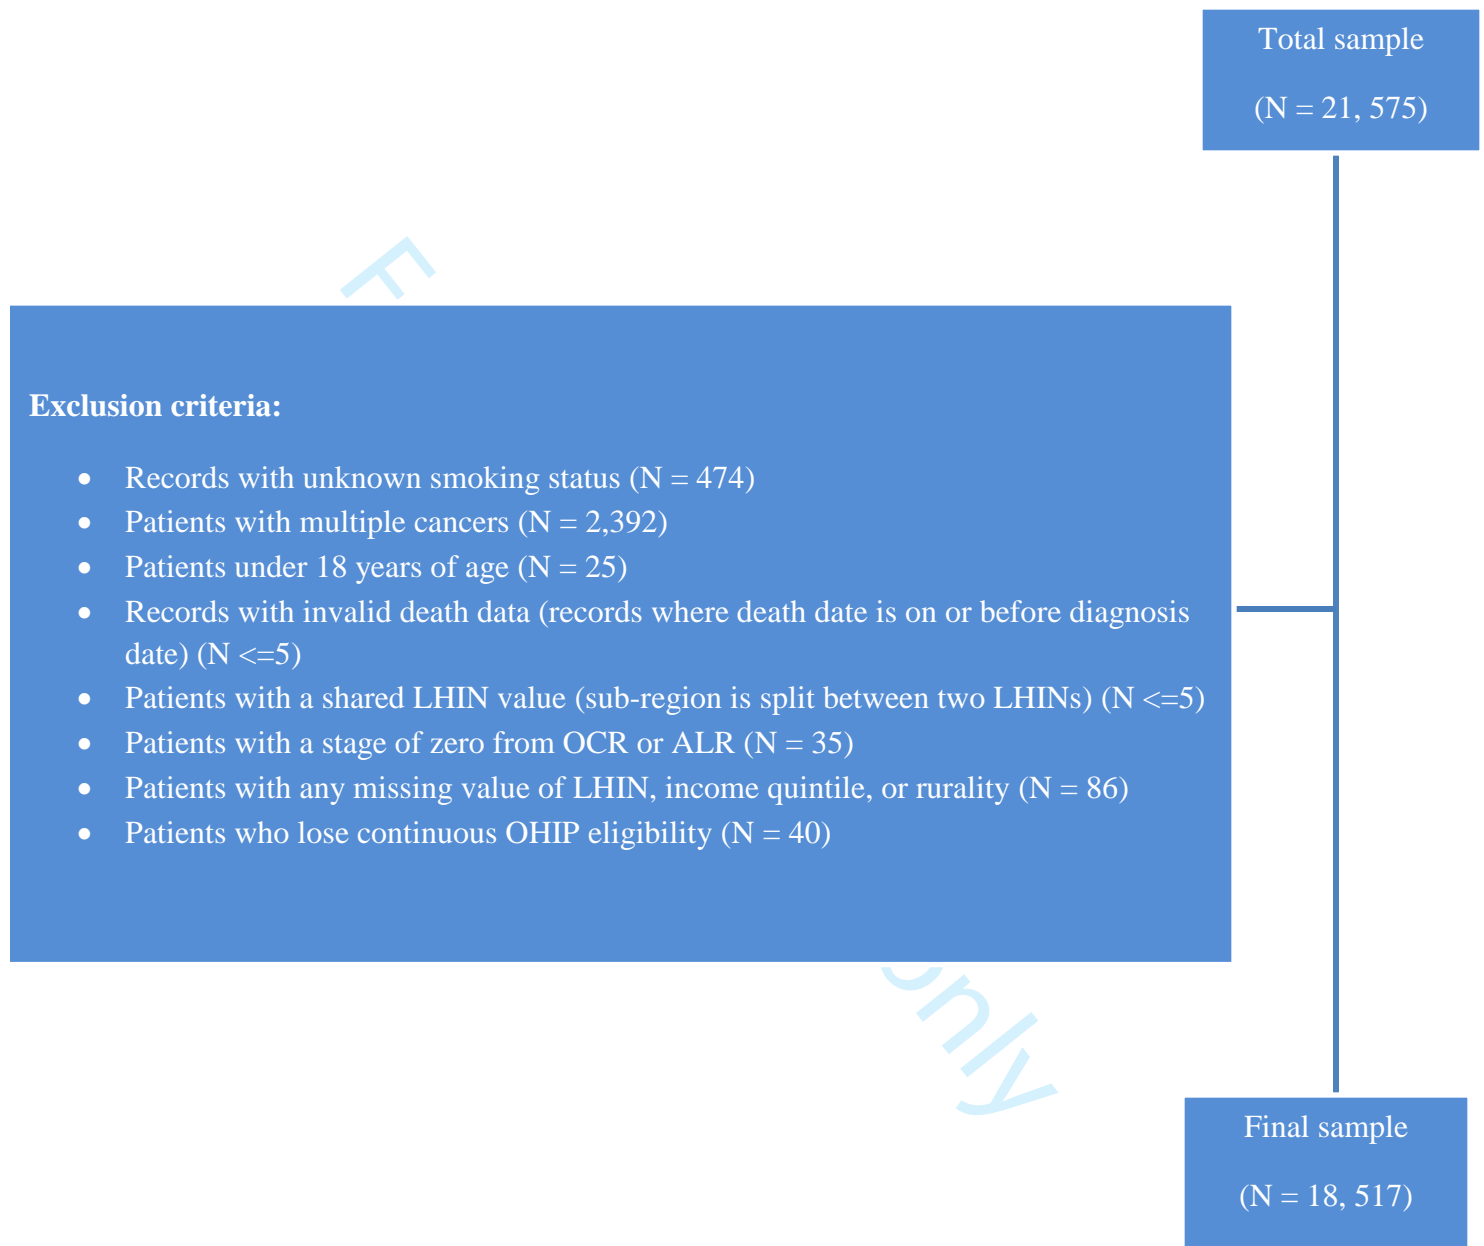

## S2 Appendix: Data elements and their definition of Cancer Care Ontario's Smoking Cessation Dataset

| Data Element               | Definition                                                                                                                                                                                                                                                                                                                                                                                                                                                                                                                                                                                           |
|----------------------------|------------------------------------------------------------------------------------------------------------------------------------------------------------------------------------------------------------------------------------------------------------------------------------------------------------------------------------------------------------------------------------------------------------------------------------------------------------------------------------------------------------------------------------------------------------------------------------------------------|
| Patient Chart Number       | Patient identifier code that is unique within the healthcare facility.                                                                                                                                                                                                                                                                                                                                                                                                                                                                                                                               |
| Submitting Hospital Number | The MOHLTC healthcare facility that submits activity to CCO.                                                                                                                                                                                                                                                                                                                                                                                                                                                                                                                                         |
| Registration Date          | Date this patient was first registered at this RCC and/or hospital for this disease.                                                                                                                                                                                                                                                                                                                                                                                                                                                                                                                 |
| Disease Sequence Number    | The numeric sequence assigned to a primary cancer for a patient at a specific healthcare facility.                                                                                                                                                                                                                                                                                                                                                                                                                                                                                                   |
| Visit Hospital Number      | MOHLTC Master Number and name for the reporting healthcare facility where the cancer activity occurred (known by CIHI as Institution Numbers).                                                                                                                                                                                                                                                                                                                                                                                                                                                       |
| Visit Program Code         | Primary cancer programs for clinic, planning and treatment activity. Includes; Radiation (RAD), Systemic (SYS), Surgical (SUR), Research (RE), Palliative (PA), Preventative Oncology (PO), or Psychosocial Oncology (PSO).                                                                                                                                                                                                                                                                                                                                                                          |
| SMK_Q1                     | Patient self-reported as being a current smoker or indicated they had smoked within the past 6 months.                                                                                                                                                                                                                                                                                                                                                                                                                                                                                               |
| SMK_Q1 Date                | The date the patient was asked SMK_Q1 (smoking status question).                                                                                                                                                                                                                                                                                                                                                                                                                                                                                                                                     |
| SMK_Q2                     | Patient was advised of the benefits of smoking cessation.                                                                                                                                                                                                                                                                                                                                                                                                                                                                                                                                            |
| SMK_Q3                     | Patient was recommended a referral to a smoking cessation program.                                                                                                                                                                                                                                                                                                                                                                                                                                                                                                                                   |
| SMK_Q3 Date                | The date when the patient was asked SMK_Q3 (assessed for quitting question).                                                                                                                                                                                                                                                                                                                                                                                                                                                                                                                         |
| SMK_Q4                     | Type of referral selected by patient. Referral is the act of directing or sending a patient to cessation service(s) for further action or support in making a quit attempt and becoming smoke free. The service should be arranged through the RCC (e.g., to a quit coach or to Canadian Cancer Society's Smokers Helpline fax referral program) to help the patient quit smoking. A referral is not simply the act of providing written information. Internal cessation referrals include services provided by the RCC (e.g. quit coaches), and external referrals are referred to outside the RCC. |

Legend: MOHLTC = Ministry of Health and Long-Term Care; CCO = Cancer Care Ontario; RCC = Regional Cancer Centre; CIHI = Canadian Institute for Health Information



**S3 Appendix: Completed STROBE statement, a checklist of items that should be included in reports of cohort studies**

|                              | <b>Item No</b> | <b>Recommendation</b>                                                                                                                                                          | <b>Page number</b> |
|------------------------------|----------------|--------------------------------------------------------------------------------------------------------------------------------------------------------------------------------|--------------------|
| <b>Title and abstract</b>    | 1              | (a) Indicate the study's design with a commonly used term in the title or the abstract                                                                                         | 1                  |
|                              |                | (b) Provide in the abstract an informative and balanced summary of what was done and what was found                                                                            | 2                  |
| <b>Introduction</b>          |                |                                                                                                                                                                                |                    |
| Background/rationale         | 2              | Explain the scientific background and rationale for the investigation being reported                                                                                           | 4                  |
| Objectives                   | 3              | State specific objectives, including any prespecified hypotheses                                                                                                               | 4                  |
| <b>Methods</b>               |                |                                                                                                                                                                                |                    |
| Study design                 | 4              | Present key elements of study design early in the paper                                                                                                                        | 4                  |
| Setting                      | 5              | Describe the setting, locations, and relevant dates, including periods of recruitment, exposure, follow-up, and data collection                                                | 4, 5, 6            |
| Participants                 | 6              | (a) Give the eligibility criteria, and the sources and methods of selection of participants. Describe methods of follow-up                                                     | 4, 5               |
|                              |                | (b) For matched studies, give matching criteria and number of exposed and unexposed                                                                                            | N/A                |
| Variables                    | 7              | Clearly define all outcomes, exposures, predictors, potential confounders, and effect modifiers. Give diagnostic criteria, if applicable                                       | 5, 6               |
| Data sources/<br>measurement | 8*             | For each variable of interest, give sources of data and details of methods of assessment (measurement). Describe comparability of assessment methods if there is more than one | 5, 6               |

|                        |     |                                                                                                                                                                                                     |                          |
|------------------------|-----|-----------------------------------------------------------------------------------------------------------------------------------------------------------------------------------------------------|--------------------------|
|                        |     | group                                                                                                                                                                                               |                          |
| Bias                   | 9   | Describe any efforts to address potential sources of bias                                                                                                                                           | 6, 7, 9, 10              |
| Study size             | 10  | Explain how the study size was arrived at                                                                                                                                                           | 4, 5                     |
| Quantitative variables | 11  | Explain how quantitative variables were handled in the analyses. If applicable, describe which groupings were chosen and why                                                                        | 5, 6, 7                  |
| Statistical methods    | 12  | (a) Describe all statistical methods, including those used to control for confounding                                                                                                               | 7                        |
|                        |     | (b) Describe any methods used to examine subgroups and interactions                                                                                                                                 | N/A                      |
|                        |     | (c) Explain how missing data were addressed                                                                                                                                                         | 4                        |
|                        |     | (d) If applicable, explain how loss to follow-up was addressed                                                                                                                                      | 4                        |
|                        |     | (e) Describe any sensitivity analyses                                                                                                                                                               | N/A                      |
| <b>Results</b>         |     |                                                                                                                                                                                                     |                          |
| Participants           | 13* | (a) Report numbers of individuals at each stage of study—e.g. numbers potentially eligible, examined for eligibility, confirmed eligible, included in the study, completing follow-up, and analyzed | 5 (S1 Appendix), 7, 8, 9 |
|                        |     | (b) Give reasons for non-participation at each stage                                                                                                                                                | N/A                      |
|                        |     | (c) Consider use of a flow diagram                                                                                                                                                                  | 5 (S1 Appendix)          |
| Descriptive data       | 14* | (a) Give characteristics of study participants (e.g. demographic, clinical, social) and information on exposures and potential confounders                                                          | 7, 8, 9                  |
|                        |     | (b) Indicate number of participants with missing data for each variable of interest                                                                                                                 | 5 (S1 Appendix)          |

|                          |     |                                                                                                                                                                                                                |           |
|--------------------------|-----|----------------------------------------------------------------------------------------------------------------------------------------------------------------------------------------------------------------|-----------|
|                          |     | (c) Summarize follow-up time (e.g., average and total amount)                                                                                                                                                  | N/A       |
| Outcome data             | 15* | Report numbers of outcome events or summary measures over time                                                                                                                                                 | 7, 8, 9   |
| Main results             | 16  | (a) Give unadjusted estimates and, if applicable, confounder-adjusted estimates and their precision (e.g., 95% confidence interval). Make clear which confounders were adjusted for and why they were included | 9         |
|                          |     | (b) Report category boundaries when continuous variables were categorized                                                                                                                                      | N/A       |
|                          |     | (c) If relevant, consider translating estimates of relative risk into absolute risk for a meaningful time period                                                                                               | N/A       |
| Other analyses           | 17  | Report other analyses done—e.g. analyses of subgroups and interactions, and sensitivity analyses                                                                                                               | N/A       |
| <b>Discussion</b>        |     |                                                                                                                                                                                                                |           |
| Key results              | 18  | Summarize key results with reference to study objectives                                                                                                                                                       | 9         |
| Limitations              | 19  | Discuss limitations of the study, taking into account sources of potential bias or imprecision. Discuss both direction and magnitude of any potential bias                                                     | 10, 11    |
| Interpretation           | 20  | Give a cautious overall interpretation of results considering objectives, limitations, multiplicity of analyses, results from similar studies, and other relevant evidence                                     | 9, 10, 11 |
| Generalizability         | 21  | Discuss the generalizability (external validity) of the study results                                                                                                                                          | 11        |
| <b>Other information</b> |     |                                                                                                                                                                                                                |           |
| Funding                  | 22  | Give the source of funding and the role of the funders for the present study and, if applicable,                                                                                                               | 12, 13    |

|  |  |                                                              |  |
|--|--|--------------------------------------------------------------|--|
|  |  | for the original study on which the present article is based |  |
|--|--|--------------------------------------------------------------|--|

\*Give information separately for exposed and unexposed groups.

N/A = Not applicable

Note: An Explanation and Elaboration article discusses each checklist item and gives methodological background and published examples of transparent reporting. The STROBE checklist is best used in conjunction with this article (freely available on the Web sites of PLoS Medicine at <http://www.plosmedicine.org/>, Annals of Internal Medicine at <http://www.annals.org/>, and Epidemiology at <http://www.epidem.com/>). Information on the STROBE Initiative is available at <http://www.strobe-statement.org>.

**S4 Appendix: Unadjusted monthly healthcare costs between cancer patients who were smokers and non-smokers (2016 CAD)**

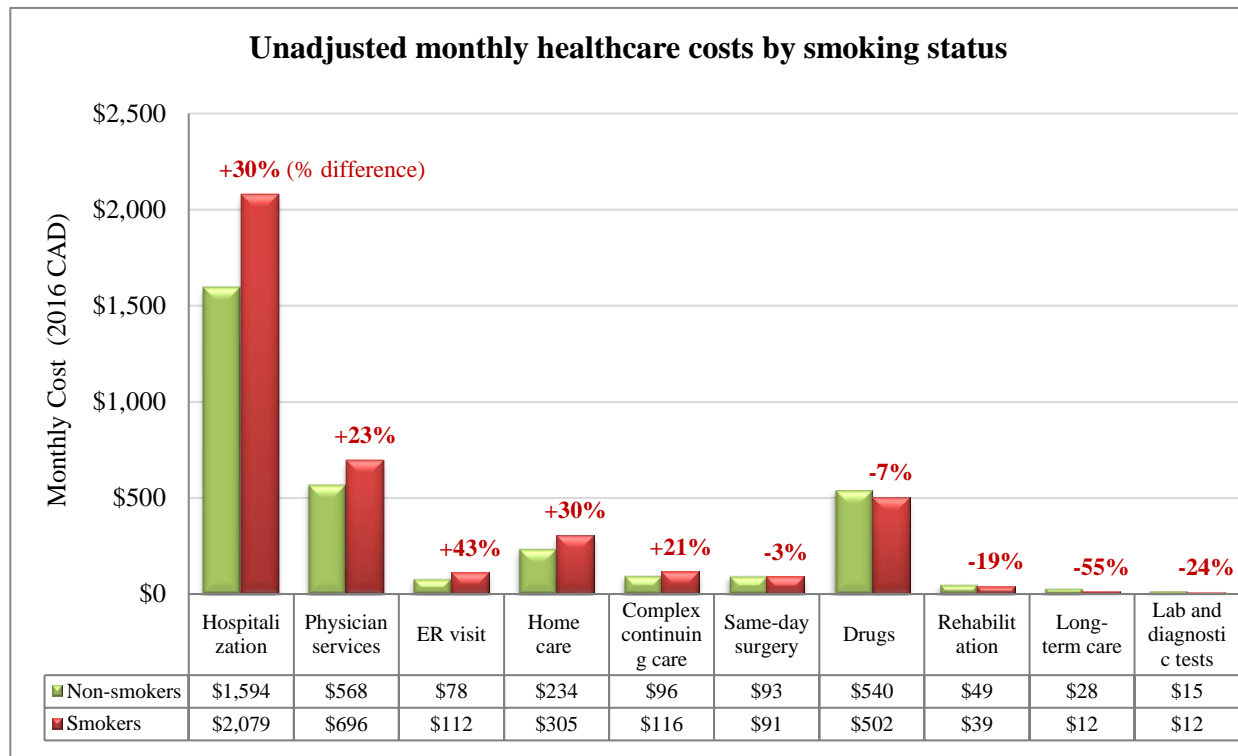

Legend: CAD = Canadian dollars.

# BMJ Open

## Impact of Smoking on Health System Costs among Cancer Patients in a retrospective cohort study in Ontario, Canada

|                                 |                                                                                                                                                                                                                                                                                                                                                                                                                                                                      |
|---------------------------------|----------------------------------------------------------------------------------------------------------------------------------------------------------------------------------------------------------------------------------------------------------------------------------------------------------------------------------------------------------------------------------------------------------------------------------------------------------------------|
| Journal:                        | <i>BMJ Open</i>                                                                                                                                                                                                                                                                                                                                                                                                                                                      |
| Manuscript ID                   | bmjopen-2018-026022.R2                                                                                                                                                                                                                                                                                                                                                                                                                                               |
| Article Type:                   | Research                                                                                                                                                                                                                                                                                                                                                                                                                                                             |
| Date Submitted by the Author:   | 02-Apr-2019                                                                                                                                                                                                                                                                                                                                                                                                                                                          |
| Complete List of Authors:       | Isaranuwatthai, Wanrudee; St. Michael's Hospital, Li Ka Shing Knowledge Institute, Centre for excellence in Economic Analysis Research (CLEAR)<br>deOliveira, Claire; Centre for Addiction and Mental Health<br>Mittmann, Nicole; Cancer Care Ontario; Sunnybrook Health Sciences Centre<br>Evans, William ; Cancer Care Ontario<br>Peter, Alice; Cancer Care Ontario<br>Truscott, Rebecca ; Cancer Care Ontario<br>Chan, Kelvin; Sunnybrook Health Sciences Centre, |
| <b>Primary Subject Heading</b>: | Health economics                                                                                                                                                                                                                                                                                                                                                                                                                                                     |
| Secondary Subject Heading:      | Smoking and tobacco                                                                                                                                                                                                                                                                                                                                                                                                                                                  |
| Keywords:                       | Smoking, Healthcare costs, Health system costs, Cancer, Economic burden                                                                                                                                                                                                                                                                                                                                                                                              |
|                                 |                                                                                                                                                                                                                                                                                                                                                                                                                                                                      |

SCHOLARONE™  
Manuscripts

Impact of smoking on health system costs among cancer patients

# Impact of Smoking on Health System Costs among Cancer Patients in a retrospective cohort study in Ontario, Canada

Wanrudee Isaranuwachai<sup>1,3-5</sup>; Claire de Oliveira<sup>1,3,5,6</sup>; Nicole Mittmann<sup>1-3,7</sup>; William K. Evans<sup>2</sup>; Alice Peter<sup>2</sup>; Rebecca Truscott<sup>2</sup>; Kelvin Kar-Wing Chan<sup>1-3,5,7,8</sup>

1. Canadian Centre for Applied Research in Cancer Control, Cancer Care Ontario, Toronto, Ontario, Canada
2. Cancer Care Ontario, Toronto, Ontario, Canada
3. University of Toronto, Toronto, Ontario, Canada
4. St. Michael's Hospital, Toronto, Ontario, Canada
5. Institute for Clinical Evaluative Sciences, Toronto, Ontario, Canada
6. Centre for Addiction and Mental Health, Toronto, Ontario, Canada
7. Sunnybrook Research Institute, Toronto, Ontario, Canada
8. Sunnybrook Odette Cancer Centre, Toronto, Ontario, Canada

\*Correspondence to:

Wanrudee Isaranuwachai, PhD  
Research Scientist, Centre for Excellence in Economic Analysis Research, Li Ka Shing Knowledge Institute, St. Michael's Hospital  
Assistant Professor, Institute for Health Policy, Management & Evaluation, University of Toronto  
T: 416-864-6060 ext. 77074  
E: [isaranuwatcw@smh.ca](mailto:isaranuwatcw@smh.ca)  
W: [www.clear-healtheconomics.ca](http://www.clear-healtheconomics.ca) | [www.hubresearch.ca](http://www.hubresearch.ca)

Word count (main text): 3,486/4,000

Impact of smoking on health system costs among cancer patients

## 1 ABSTRACT

### 2 Objective

3 Smoking is the main modifiable cancer risk factor. The objective of this study was to examine  
4 the impact of smoking on health system costs among newly diagnosed adult cancer patients.  
5 Specifically, costs of cancer patients who were current smokers were compared with those of  
6 non-smokers from a publicly funded health system perspective.  
7

### 8 Methods

9 This population-based cohort study of cancer patients used administrative databases to identify  
10 smokers and non-smokers (1 April 2014 - 31 March 2016) and their health care costs in the 12-  
11 24 months following a cancer diagnosis. The health services included were hospitalizations,  
12 emergency room visits, drugs, home care services, and physician services (from time of  
13 diagnosis onwards). The difference in cost (i.e. incremental cost) between cancer patients who  
14 were smokers and those who were non-smokers was estimated using a generalized linear model  
15 (with log link and gamma distribution), and adjusted for age, sex, neighborhood income, rurality,  
16 cancer site, cancer stage, geographical region, and comorbidities.  
17

### 18 Results

19 This study identified 3,606 smokers and 14,911 non-smokers. Smokers were significantly  
20 younger (61 vs 65 years), more likely to be male (53%), lived in poorer neighborhoods, had  
21 more advanced cancer stage, and were more likely to die within one year of diagnosis, compared  
22 to non-smokers. The regression model revealed that on average, smokers had significantly higher  
23 monthly healthcare costs (\$5,091) than non-smokers (\$4,847),  $p < 0.05$ .  
24

### 25 Conclusions

26 Smoking status has a significant impact on healthcare costs among cancer patients. On average,  
27 smokers incurred higher healthcare costs than non-smokers. These findings provide a further  
28 rationale for efforts to introduce evidence-based smoking cessation programs as a standard of  
29 care for cancer patients as they have the potential to not only improve patients' outcomes but  
30 also to reduce the economic burden of smoking on the healthcare system.  
31

### 32 Keywords:

33 Smoking; Healthcare costs; Health system costs; Cancer; Economic burden  
34  
35  
36  
37  
38  
39  
40  
41  
42  
43  
44  
45  
46  
47  
48  
49  
50  
51  
52  
53  
54  
55  
56  
57  
58  
59  
60



## Impact of smoking on health system costs among cancer patients

**Strengths and Limitations of this study**

- Findings from this study represent one piece of evidence in support of the integration of smoking cessation programs into cancer care treatment plans as a standard of practice
- This study adds to the literature by providing up-to-date and precise health care cost estimates of smoking using existing administrative person-level costing approaches
- A limitation of this study is that it excludes a subset of relevant variables that may have had an influence on health outcomes and cost due to the nature of the study design (e.g., type of tumour, amount and duration of smoking)
- This study focused on the cost incurred to the public healthcare payer and, therefore, indirect costs were not considered but could be explored in future research
- The findings from this study should motivate policy makers to design, implement, and fund smoking cessation programs, which have the potential not only to improve patients' treatment outcomes but also to reduce the economic burden of smoking on the healthcare system

Impact of smoking on health system costs among cancer patients

## 1 INTRODUCTION

2 Cancer care is a substantial component of health care expenditures of developed  
3 countries.(1-3) In Canada, the economic burden of cancer was estimated to be \$7.5 billion in  
4 2012.(4) It is well recognized that smoking is the main modifiable risk factor for cancer (5) and it  
5 is estimated that it contributes to approximately 30% of all cancer deaths.(6, 7) Smoking can also  
6 harm directly or indirectly almost every organ of the body and is responsible for a number of  
7 other chronic diseases that contribute to higher health care costs.(5, 8-11) Quitting smoking after  
8 a diagnosis of cancer has been associated with improved general health, better quality of life,  
9 reduced toxicity, greater response to treatment (such as radiation therapy), and decreased risk of  
10 disease recurrence and second primary cancers.(12-18) Nevertheless, cancer patients are just as  
11 likely to smoke as the general public with the smoking rate being approximately 20%.(19)  
12 Furthermore, smoking cessation programs are rare in oncology settings.(12, 13, 20)

13 Although the impact of smoking on healthcare costs has been examined in the general  
14 population, there is very little information on the impact of smoking on the cost of cancer care in  
15 patients who are smokers compared to those who are not.

16 The study objective was to compare the health system costs of cancer patients who were  
17 current smokers with those of non-smokers between 2014 and 2016, from the perspective of a  
18 public healthcare payer, using administrative databases in Ontario, Canada. We hypothesized  
19 that smoking would be associated with higher overall health system costs as a result of the need  
20 to manage more frequent and severe toxicities of treatment, more frequent disease recurrence, as  
21 well as more non-cancer related morbidities. Understanding the cost burden of smokers with  
22 cancer may help drive policy change by providing an economic argument for investing in  
23 cessation resources and programs for cancer patients who smoke.

## 25 MATERIALS AND METHODS

26 This study was a secondary data analysis using existing administrative databases at  
27 Cancer Care Ontario (CCO) and the Institute for Clinical Evaluative Sciences (ICES), both  
28 located in Toronto, Ontario, Canada. Research ethics approval was obtained from St. Michael's  
29 Hospital, Toronto, Ontario, Canada.

### 30 Study population and setting

31 The study population consisted of newly diagnosed adult cancer patients, aged  $\geq 18$  years,  
32 who received ambulatory care from one of the 14 Regional Cancer Centres (RCCs) in Ontario,  
33 Canada, between 1 April 2014 and 31 March 2015. The Ontario Cancer Registry (OCR) was  
34 used to identify our study population. We excluded patients with: 1) an invalid health card (i.e.,  
35 who were not eligible for public health care insurance); 2) an invalid death date (i.e., where death  
36 date was on or before the date of diagnosis); 3) missing data on smoking status; 4) a cancer stage  
37 of zero; 5) missing data on neighborhood-level income, geographical location, or rurality of  
38 residence; 6) lost health care coverage during the follow-up time; or 7) had multiple cancers.  
39 Each patient was followed until death or the end of the observation period (31 March 2016),

## Impact of smoking on health system costs among cancer patients

1  
2  
3 1 whichever came first. S1 Appendix provides a flow diagram of the number of patients excluded  
4 2 from the analysis.  
5

### 3 **Study population sub-groups (smokers and non-smokers)**

4 The study population of cancer patients was divided into those who were identified as  
5 smokers and non-smokers. Cancer patients who were either currently smoking at the time of  
6 diagnosis or who had smoked in the previous 6 months of their first ambulatory care visit were  
7 identified as *smokers*, whereas all others were identified as *non-smokers*. Information on *smoking*  
8 *status* was obtained from the *CCO Smoking Cessation Dataset (CCOSCD)*, which is part of the  
9 Activity Level Reporting (ALR) database housed at CCO. The CCOSCD collects information on  
10 the self-reported smoking status of newly diagnosed ambulatory cancer patients, whether the  
11 current smoker has been advised to quit, and whether the patient has been referred for smoking  
12 cessation counselling and/or pharmacotherapy.<sup>(21)</sup> Each RCC submits the data on these metrics  
13 on a monthly basis to CCO as part of CCO's Smoking Cessation Program. S2 Appendix describes  
14 the data elements in the dataset and their definitions.  
15

### 16 **Data sources and variables**

17 A number of databases were used to obtain healthcare utilization data: the ALR database,  
18 the New Drug Funding Program (NDFP) database, the Ontario Drug Benefit (ODB) claims  
19 database, the Discharge Abstract Database (DAD) obtained from the Canadian Institute for  
20 Health Information (CIHI), the National Ambulatory Care Reporting System (NACRS) obtained  
21 from CIHI, the Ontario Health Insurance Program (OHIP) claims database, the Home Care  
22 Database (HCD), the Continuing Care Reporting System (CCRS), and the National  
23 Rehabilitation Reporting System (NRS). Table 1 provides a brief description of each database.  
24

25 **Table 1. Administrative databases used in the analysis**

| Database | Description                                                                                                                                                                                                                                                                                                                                                                                                                                                                                                                |
|----------|----------------------------------------------------------------------------------------------------------------------------------------------------------------------------------------------------------------------------------------------------------------------------------------------------------------------------------------------------------------------------------------------------------------------------------------------------------------------------------------------------------------------------|
| OCR      | The Ontario Cancer Registry is the largest population-based cancer registry in Canada. The OCR contains over 300 fields, including primary site of cancer, county of residence at diagnosis and health insurance number.                                                                                                                                                                                                                                                                                                   |
| ALR      | The Ontario Activity Level Reporting provides a set of data elements from selected Ontario Cancer Centers that cannot be obtained from other providers. This information is used to support management decision making process.                                                                                                                                                                                                                                                                                            |
| NDFP     | The New Drug Funding Program data are used for reimbursement decisions and to support cancer system planning for systemic therapy. To be eligible for reimbursement through the NDFP, hospitals must submit eligibility/enrolment data and treatment data in compliance with monthly billing deadlines. For treatment reimbursement, each patient must be enrolled in the NDFP by providing eligibility/enrolment data that include patient-specific demographic information and answers to a series of medical questions. |
| ODB      | The Ontario Drug Benefit Formulary lists prescription drugs that are covered for patients over 65 years, and selected other groups (e.g., those that require income supports).                                                                                                                                                                                                                                                                                                                                             |
| CIHI DAD | Hospitalization and comorbidity data are in the Discharge Abstract Database from                                                                                                                                                                                                                                                                                                                                                                                                                                           |

## Impact of smoking on health system costs among cancer patients

|               |                                                                                                                   |
|---------------|-------------------------------------------------------------------------------------------------------------------|
|               | the Canadian Institute for Health Information.                                                                    |
| CIHI<br>NACRS | Emergency room visits and same day surgery data were obtained from the National Ambulatory Care Reporting System. |
| OHIP          | Ontario Health Insurance Program reports outpatient physician visits based on fee-for-service claims.             |
| HCD           | Home Care Database captures all home care services in Ontario.                                                    |
| CCRS          | The Continuing Care Reporting System reports utilization of continuing care.                                      |
| NRS           | National Rehabilitation Reporting System captures rehabilitation utilization.                                     |

*Healthcare costs*

The outcome of interest for the study was total and disaggregated healthcare costs from the perspective of the Ontario Ministry of Health and Long-Term Care (MOHLTC) from the time of diagnosis. Patients in Ontario receive publicly funded health care, which covers costs for health services (e.g., hospitalization) including the costs of most drugs for patients over the age of 65 years or who are on social assistance. Healthcare costs included costs associated with hospitalizations, same-day surgeries, emergency room (ER) visits, outpatient prescription drugs, rehabilitation, complex continuing care, home care services, physician services, and laboratory and diagnostic tests. Cost estimates were derived using an existing costing algorithm at ICES. For example, hospitalizations and ER visit costs were estimated by multiplying a resource intensity weight (measure of utilization) with an average cost per hospital stay or ER visit (unit cost).<sup>(22)</sup> Physician visit costs were obtained from the Ontario Schedule of Benefits for Physician Services.<sup>(23)</sup> Additional details on the methods to estimate cost can be found elsewhere.<sup>(4, 22, 24)</sup> Costs were adjusted to 2016 Canadian dollars (CAD) using the health component of the Consumer Price Index in health care category (1 CAD = approximately 0.78 US dollars).<sup>(25)</sup>

*Other variables*

Due to potential differences between smokers and non-smokers, we controlled for patient characteristics by adjusting for a number of variables such as age at diagnosis, sex, cancer site, cancer stage (where available), geographical location of residence (i.e., rurality and Local Health Integration Network (LHIN)), neighborhood income quintile, and comorbidity (measured by the Adjusted Clinical Groups<sup>®</sup> or ACG<sup>®</sup>), all of which were obtained from the previously mentioned databases. In Ontario, publicly funded health care services are administered on a regional basis by the LHINs, which serve as the regional health authority. Each of the 14 LHINs is responsible for a distinct geographical location.<sup>(26)</sup> The ACG<sup>®</sup> system is a patient case-mix adjustment system used to measure health status by grouping diagnoses into clinical groups. The goal of this system is to assign each patient a single value, which represents the patient's comorbidity through his/her expected or actual use of health services, where a higher number refers to a greater number of comorbidities (0-4, 5-6, 7-9, and 10+).<sup>(27)</sup> In this study, this value was assigned at the time of the cancer diagnosis. Cancer sites or groupings were reported on as follows: bladder; bronchus and lung; breast; colorectal; corpus uteri; head and neck; prostate; melanoma; and "other". Other included cancers of the anus and anal canal, brain, esophagus, hematopoietic, liver, ovary, pancreas, renal, stomach, testis, and thyroid. The four most common types of cancer were lung, breast, colorectal, and prostate cancer. The extent of cancer was reported in one of 3 groups: stage 1-2; stage 3-4; and unknown stage. Cancer stage data in Ontario were available predominantly for

## Impact of smoking on health system costs among cancer patients

the four most common types of cancer (e.g., lung, breast, prostate, and colorectal); therefore, it was necessary to create a separate category for unknown cancer stage.

### Analysis

The raw costs for non-smokers and smokers were reported descriptively. To adjust for different follow up times, as some patients (particularly smokers) have a greater chance of dying than non-smokers, we estimated person-month costs.(28)

The output of the economic analysis was the incremental cost (reported in 2016 CAD) between cancer patients who smoked and those who did not. We analyzed our dependent variable (monthly healthcare costs) using regression models to estimate the difference in expected health care cost between the two groups using recycled predictive methods,(28-30) as described in the following equation:

$$Cost_i = \beta_0 + \beta_1(smoking\ status)_i + \beta_2(age)_i + \beta_3(sex)_i + \beta_4(income\ quintile)_i + \beta_5(rurality)_i + \beta_6(cancer\ stage)_i + \beta_7(cancer\ type)_i + \beta_8(LHIN)_i + \epsilon_i$$

where  $cost_i$  represents a monthly cost of patient  $I$ ,  $\beta_x$  refers to a coefficient estimate of each variable,  $X$ , such as smoking status, age, and sex and  $\epsilon$  represents the error term. The smoking status variable was the primary independent variable, and the regression model was adjusted for potential confounding variables, such as age, sex, income, rurality, cancer stage, cancer site, geographical region (LHIN), and comorbidity. To accommodate for the skewness of cost data, a generalized linear model with log link and gamma family was used to estimate the incremental cost between smokers and non-smokers.(28, 31) We also conducted a Modified Park test to ensure that our selected model was the best fit.(28, 32) Collinearity was also explored using Variance Inflation Factor, and we found no evidence of collinearity. S3 Appendix reports a completed STROBE statement, a checklist of items that should be included in reports of cohort studies.

### Patient and public involvement

There was no involvement of patients during the study period but there are knowledge translation activities with various knowledge users.

## RESULTS

There were 3,606 smokers and 14,911 non-smokers in our study cohort (see Table 2). Cancer patients who smoked were significantly younger (61 vs 65 years), more likely to be male (53% vs 45%), live in lower income neighborhoods (25% of smokers compared to 16% of non-smokers were in the lowest income quintile), and more likely to live in rural areas (18% vs 15%) compared to cancer patients who were non-smokers. Cancer stage data was available for approximately 70% of patients over the study period. Of those with available cancer stage data, smokers were more likely to have advanced cancer stages than non-smokers. Almost 40% of

## Impact of smoking on health system costs among cancer patients

smokers were in stage 3-4 compared to approximately 27% of non-smokers. Roughly 25% of smokers died within 1 year of diagnosis compared to 15% of non-smokers who died over the same follow-up period. Approximately 30% of smokers were in the lowest comorbidity level (0-4) compared to 24% of non-smokers. Only 19% of smokers were in the highest comorbidity level (10+) compared to 23% of non-smokers. Among all cancer types studied, lung cancer was the most common type of cancer among smokers followed by breast cancer. For non-smokers, the most common cancer type was breast cancer followed by prostate cancer and lung cancer (Table 2); all three were identified as common types of cancer.

**Table 2. Demographic characteristics of study population between smokers and non-smokers**

| Variable*                              | Non-smokers        | Smokers            |
|----------------------------------------|--------------------|--------------------|
| N                                      | 14,911             | 3,606              |
| Mean age in years (SD)                 | 65.1 (13.6)        | 60.6 (12.1)        |
| Male                                   | 6,681 (44.8%)      | 1,907 (52.9%)      |
| Age groups in years, N (%)             |                    |                    |
| 18-44                                  | 1,116 (7.5%)       | 310 (8.6%)         |
| 45-54                                  | 1,973 (13.2%)      | 661 (18.3%)        |
| 55-64                                  | 3,443 (23.1%)      | 1,217 (33.7%)      |
| 65-74                                  | 4,525 (30.3%)      | 1,035 (28.7%)      |
| 75+                                    | 3,854 (25.8%)      | 383 (10.6%)        |
| Income quintile, N (%)                 |                    |                    |
| 1 (lowest)                             | 2,387 (16.0%)      | 887 (24.5%)        |
| 2                                      | 2,597 (17.4%)      | 818 (22.7%)        |
| 3                                      | 3,065 (20.6%)      | 691 (19.2%)        |
| 4                                      | 3,351 (22.5%)      | 649 (18.0%)        |
| 5 (highest)                            | 3,511 (23.5%)      | 561 (15.6%)        |
| Living in rural areas, N (%)           | 2,267 (15.2%)      | 662 (18.4%)        |
| Death within 1 year, N (%)             | 2,211 (14.8%)      | 850 (23.6%)        |
| Mean time from diagnosis to death (SD) | 255.2 days (163.3) | 236.8 days (159.6) |
| Comorbidity (ACG), N (%)               |                    |                    |
| 0-4                                    | 3,589 (24.1%)      | 1,092 (30.3%)      |
| 5-6                                    | 3,295 (22.1%)      | 838 (23.2%)        |
| 7-9                                    | 4,533 (30.4%)      | 985 (27.3%)        |
| 10+                                    | 3,494 (23.4%)      | 691 (19.2%)        |
| Cancer stage, N (%)                    |                    |                    |
| 1-2                                    | 6,378 (42.8%)      | 1,289 (35.7%)      |
| 3-4                                    | 3,958 (26.5%)      | 1,392 (38.6%)      |
| Unknown                                | 4,575 (30.7%)      | 925 (25.7%)        |
| Cancer types, N (%)                    |                    |                    |
| Lung                                   | 1,673 (11.2%)      | 1,017 (28.2%)      |
| Breast                                 | 3,088 (20.7%)      | 497 (13.8%)        |
| Head and neck                          | 614 (4.1%)         | 292 (8.1%)         |
| Prostate                               | 1,694 (11.4%)      | 290 (8.0%)         |

## Impact of smoking on health system costs among cancer patients

|              |               |               |
|--------------|---------------|---------------|
| Colorectal   | 1,460 (9.8%)  | 268 (7.4%)    |
| Melanoma     | 563 (3.8%)    | 81 (2.2%)     |
| Corpus uteri | 701 (4.7%)    | 64 (1.8%)     |
| Bladder      | 196 (1.3%)    | 43 (1.2%)     |
| Other        | 4,922 (33.0%) | 1,054 (29.3%) |

Legend: ACG= Adjusted Clinical Groups®; N = sample size; SD = standard deviation.

Note: \* the two groups were significantly different across all variables ( $p < 0.05$ ).

S4 Appendix reports the unadjusted monthly healthcare costs between the study groups. Generally, smokers incurred higher healthcare costs than non-smokers for hospitalizations, physician services, ER visits, home care services, and complex continuing care. Focusing on specific types of healthcare costs, smokers had approximately 30% higher hospitalization costs, 43% higher ER visit costs, 23% higher physician visit costs, and 30% higher home care costs than non-smokers. Overall, total monthly health care costs were higher among smokers (\$5,649  $\pm$  \$7,169) than non-smokers (\$4,704  $\pm$  \$6,737).

From the adjusted regression model (controlling for age, sex, income, rurality, stage, disease site, geographical region, and comorbidity), on average, smokers had significantly higher monthly healthcare costs (\$5,091) than non-smokers (\$4,847). Smokers incurred \$244 ( $\pm$  113; 95% confidence interval of \$242, \$245 and interquartile range \$145, \$328) more in healthcare cost per month, or \$2,928 more per year than non-smokers,  $p=0.0047$ .

## DISCUSSION

Understanding the impact of smoking on the healthcare costs of cancer patients may strengthen the rationale for decision makers to further invest in smoking cessation programs. It is generally understood that smoking can lead to worse clinical outcomes, but there is a paucity of literature on the impact of smoking on healthcare costs among cancer patients. The findings from this analysis are aligned with the limited available literature. Specifically, we found that cancer patients who were smokers were younger and more commonly males compared to cancer patients who were not smokers, which is in line with the literature.(10, 33) Additionally, smokers had, on average, almost 20% higher total monthly healthcare costs than non-smokers. When focusing mainly on hospitalizations, the incremental cost due to smoking was approximately 30% higher than non-smokers, in contrast to an increase of up to 50% in incremental hospitalization costs among smokers reported in the literature.(9, 34) Our findings suggest that cancer patients who are smokers are responsible for a greater economic burden than non-smokers.

Evidence on the importance of smoking cessation for cancer patients has strengthened in recent years. Several cancer care institutions in the United States have emerged as leaders in this field by incorporating smoking cessation programs into practice.(35) Ontario is the first jurisdiction in North America to implement a systematic smoking cessation program in all of its RCCs. Under the leadership of CCO, the provincial agency responsible for improving the quality of cancer services in Ontario, a smoking cessation program provides support for new ambulatory cancer patients by screening patients for tobacco use, advising on the benefits of quitting, and

## Impact of smoking on health system costs among cancer patients

1 offering referrals to smoking cessation resources. Understanding the impact of smoking on the  
2 healthcare costs incurred by cancer patients may further strengthen the rationale for the program  
3 and encourage policy makers (e.g., public healthcare payer) to invest in smoking cessation  
4 programs. The findings from this study may also be beneficial to other cancer agencies, and not-  
5 for-profit organizations (e.g., American Cancer Society, Worldwide Cancer Research, and  
6 Canadian Partnership Against Cancer) engaged in developing smoking cessation policies and  
7 implementing smoking cessation programs. In addition, this study may help to inform the  
8 general public about the burden of smoking among cancer patients and motivate hospital and  
9 health system administrators about the incremental economic impact of failing to help cancer  
10 patients quit smoking. The findings from this study represent a further piece of evidence in  
11 support of the integration of smoking cessation programs into cancer care treatment plans (in  
12 settings similar to the study setting) and will hopefully stimulate further research into the optimal  
13 implementation of smoking cessation programs in order to improve cancer care outcomes and  
14 reduce morbidity, mortality, and cost.

15 This study has strengths and limitations, which should be highlighted. The medical  
16 literature has called for more up-to-date and precise health care cost estimates of smoking.<sup>(9, 36)</sup>  
17 Existing Canadian literature has used cost estimates for smokers from the 1990s and/or  
18 employed high-level costing approaches, instead of using patient-level cost estimates. These  
19 prior estimates might not accurately reflect the true healthcare cost difference between smokers  
20 and non-smokers.<sup>(9, 36-38)</sup> This study represents a first step in systematically collecting these  
21 data and linking them to data on system-level resources. Furthermore, using existing data from  
22 administration databases, we were able to conduct the analysis with adjustment of potential  
23 confounders to increase the validity of the findings.

24 In terms of limitations, data on smoking status were limited to one assessment during the  
25 initial consultation period (28 days) for new ambulatory cancer patients. Therefore, it is possible  
26 that patients may have changed their smoking status after their cancer diagnosis but data on  
27 change in smoking status were not captured. Our analysis followed the intent-to-treat principle  
28 and was applied to both study groups (i.e., smokers at the time of diagnosis or who had quit in  
29 the last six months remained smokers throughout the analysis and vice versa). If some “smokers”  
30 quit smoking, their medical outcomes or tolerance to treatment may have been better than that of  
31 persistent smokers (presumably with less resource utilization and less cost). Consequently, this  
32 analysis may have provided a lower bound of the incremental cost. Individuals who had quit  
33 prior to 6 months would likely still have more health complications and resource utilization than  
34 life-long non-smokers. Classification of these patients as non-smokers may again lead to the  
35 possibility of an underestimation of the difference in cost between smokers and non-smokers.  
36 The data available on smoking status limited our ability to analyze former smokers and recent  
37 quitters as separate groups.

38 Our analysis was also limited by the available follow-up data. As the follow-up period  
39 was relatively short, it is possible that significant differences might be observed with a longer  
40 period of follow-up. It is also possible that, given the nature of the study design, relevant  
41 variables were not collected. For example, cancer stage data were available for the common  
42 types of cancer (i.e., lung, breast, colorectal, and prostate cancer), but not for some other tumour  
43 types, such as head and neck cancer. In addition to the common cancer types, our study included  
44 other tumour types (e.g., brain, liver) but their smaller numbers did not allow us to examine them  
45 separately. This could be a future area of research. Patients with multiple cancers were excluded  
46 from the study to distinguish the impact of smoking on a single tumour type. In addition, there



## Impact of smoking on health system costs among cancer patients

1  
2  
3 1 were no data available on the amount or duration of smoking, which would likely have an  
4 2 influence on health outcomes and cost. Smoking has been shown to increase both direct and  
5 3 indirect costs.(9, 37, 38) However, because our study used administrative data, indirect costs  
6 4 were not explored. Future clinical trials could consider prospectively documenting the specific  
7 5 clinical and financial benefits of smoking cessation as part of clinical care to evaluate the  
8 6 smoking cessation programs. Finally, the cost to implement a smoking cessation program was  
9 7 not included in this analysis, and may cancel out some of the economic benefits of helping  
10 8 smokers to stop smoking.

11 9 In conclusion, cancer patient smoking status has a significant impact on health system  
12 10 costs. On average, smokers incurred higher healthcare costs than non-smokers. These findings  
13 11 provide an additional reason for the introduction of evidence-based smoking cessation programs  
14 12 for cancer patients. The findings from this study should motivate policy makers to fund, design,  
15 13 and implement smoking cessation programs, which have the potential not only to improve  
16 14 patients' treatment outcomes but also to reduce the economic burden of smoking on the  
17 15 healthcare system.

Impact of smoking on health system costs among cancer patients

## Abbreviations

|        |                                                        |
|--------|--------------------------------------------------------|
| ACG®   | Adjusted Clinical Groups®                              |
| ARCC   | Canadian Centre for Applied Research in Cancer Control |
| CAD    | Canadian dollars                                       |
| CCO    | Cancer Care Ontario                                    |
| CCOSCD | CCO Smoking Cessation Dataset                          |
| ER     | emergency room                                         |
| ICES   | Institute for Clinical Evaluative Sciences             |
| LHIN   | Local Health Integration Network                       |
| MOHLTC | Ontario Ministry of Health and Long-Term Care          |
| RCCs   | Regional Cancer Centres                                |

## Acknowledgments

We would like to acknowledge the assistance of Refik Saskin and Lisa Ellison from the Institute for Clinical Evaluative Sciences, and Stephanie Young, Mohammad Hoque, Elisa Candido, Julie Klein-Geltink, Brooke Filsinger, the CCO Research Office, and the Data Disclosure Committee from Cancer Care Ontario including Ashna Jinah and Dr. Deena from St. Michael's Hospital for preparation of submission.

This study made use of de-identified data from the ICES Data Repository, which is managed by the Institute for Clinical Evaluative Sciences with support from its funders and partners: Canada's Strategy for Patient-Oriented Research (SPOR), the Ontario SPOR Support Unit, the Canadian Institutes of Health Research and the Government of Ontario. The opinions, results and conclusions reported are those of the authors. No endorsement by ICES or any of its funders or partners is intended or should be inferred. Parts of this material are based on data and/or information compiled and provided by CIHI. However, the analyses, conclusions, opinions and statements expressed in the material are those of the author(s), and not necessarily those of CIHI. Parts of this material are based on data and information provided by Cancer Care Ontario (CCO). The opinions, results, view, and conclusions reported in this paper are those of the authors only.

1 Impact of smoking on health system costs among cancer patients  
2

### 3 **Contributors** 4

5 All authors made important contributions to this work.

6 WI, CdO, NM, WE, AP, RT, KKWC contributed to this study's conception and design.

7 WI, NM, AP, RT were responsible for data collection and assembly.

8 All authors (WI, CdO, NM, WE, AP, RT, KKWC) were involved in data analysis and  
9 interpretation.

10 WI, CdO, NM, WE drafted the paper, and all authors critically reviewed and suggested  
11 amendments prior to submission.

12 The corresponding author attests that all listed authors meet authorship criteria and that others  
13 not meeting the criteria have been omitted.

### 14 **Funding:** 15

16 This work was funded by the Canadian Centre for Applied Research in Cancer Control (ARCC).  
17 ARCC receives core funding from the Canadian Cancer Society Research Institute (Grant #:  
18 2015-703549).  
19

### 20 **Competing interests:** 21

22 All authors have completed the ICMJE uniform disclosure form at  
23 [www.icmje.org/coi\\_disclosure.pdf](http://www.icmje.org/coi_disclosure.pdf) and declare: no support from any organization for the  
24 submitted work; no financial relationships with any organizations that might have an interest in  
25 the submitted work in the previous three years; no other relationships or activities that could  
26 appear to have influenced the submitted work.  
27

### 28 **Ethics approval:** 29

30 Research ethics approval was obtained from St. Michael's Hospital, Toronto, Ontario, Canada.  
31

### 32 **Data sharing statement:** 33

34 This study made use of de-identified data from the Institute for Clinical Evaluative Sciences and  
35 Cancer Care Ontario who have the right and control over the data used.  
36

### 37 **Supporting Information** 38

39 S1 Appendix: Flow diagram on the number of excluded patients  
40  
41  
42  
43  
44  
45  
46  
47  
48  
49  
50  
51  
52  
53

1 Impact of smoking on health system costs among cancer patients  
2

3 S2 Appendix: Data elements and their definition of Cancer Care Ontario's Smoking Cessation  
4 Dataset  
5

6 S3 Appendix: Completed STROBE statement, a checklist of items that should be included in  
7 reports of cohort studies  
8

9  
10 S4 Appendix: Unadjusted monthly healthcare costs between cancer patients who were smokers  
11 and non-smokers (2016 CAD)  
12  
13  
14  
15  
16  
17  
18  
19  
20  
21  
22  
23  
24  
25  
26  
27  
28  
29  
30  
31  
32  
33  
34  
35  
36  
37  
38  
39  
40  
41  
42  
43  
44  
45  
46  
47  
48  
49  
50  
51  
52  
53  
54  
55  
56  
57  
58  
59  
60

For peer review only

## REFERENCES

1. Kesselheim AS, Avorn J, Sarpatwari A. The High cost of prescription drugs in the United States: origins and prospects for reform. *JAMA*. 2016;316(8):858-71.
2. Vogler S, Vitry A. Cancer drugs in 16 European countries, Australia, and New Zealand: a cross-country price comparison study. *The Lancet Oncology*. 2016;17(1):39-47.
3. Canadian Cancer Society. Nearly 1 in 2 Canadians expected to get cancer: report 2017 [Available from: <http://www.cancer.ca/en/about-us/for-media/media-releases/national/2017/canadian-cancer-statistics/?region=bc>].
4. de Oliveira C, Weir S, Rangrej J, Krahn MD, Mittmann N, Hoch JS, et al. The economic burden of cancer care in Canada: a population-based cost study. *CMAJ open*. 2018;6(1):E1-E10.
5. Cancer Care Ontario. Cancer Risk Factors in Ontario: Tobacco. 2014.
6. American Cancer Society. Tobacco-related cancers fact sheet 2014 [cited 2014]. Available from: <http://www.cancer.org/cancer/cancercauses/tobaccocancer/tobacco-related-cancer-fact-sheet>.
7. Anand P, Kunnumakkara AB, Sundaram C, Harikumar KB, Tharakan ST, Lai OS, et al. Cancer is a preventable disease that requires major lifestyle changes. *Pharmaceutical Research* 2008;25(9):2097-116.
8. Zimovetz EA, Wilson K, Samuel M, Beard SM. A review of cost-effectiveness of varenicline and comparison of cost-effectiveness of treatments for major smoking-related morbidities. *Journal of Evaluation in Clinical Practice*. 2011;17(2):288-97.
9. Sari AA, Rezaei S, Arab M, Majdzadeh R, Matin BK, Zandian H. Effects of Smoking on Cost of Hospitalization and Length of Stay among Patients with Lung Cancer in Iran: a Hospital-Based Study. *Asian Pacific journal of cancer prevention: APJCP*. 2016;17(9):4421-6.
10. Sherratt F, Field J, Marcus M. Association between smoking and health outcomes in an economically deprived population: the Liverpool Lung Project. *J Epidemiol Community Health*. 2017;jech-2016-208730.
11. U.S. Department of Health and Human Services. The Health Consequences of Smoking: 50 Year of Progress. A Report of the Surgeon General. Atlanta, GA: U.S. Department of Health and Human Services, Centers for Disease Control and Prevention, National Center for Chronic Disease Prevention and Health Promotion, Office on Smoking and Health; 2014.
12. Toll BA, Brandon TH, Gritz ER, Warren GW, Herbst RS. Assessing tobacco use by cancer patients and facilitating cessation: an American Association for Cancer Research policy statement. *Clin Cancer Res*. 2013;19(8):1941-8.
13. Nayan S, Gupta MK, Strychowsky JE, Sommer DD. Smoking cessation interventions and cessation rates in the oncology population: an updated systematic review and meta-analysis. *Otolaryngol Head Neck Surg*. 2013;149(2):200-11.
14. Cancer Care Ontario. Cancer Fact: Reported tobacco screening increases among new cancer patients 2017 [Available from: [www.cancercareontario.ca/cancerfacts](http://www.cancercareontario.ca/cancerfacts)].
15. Dobson Amato KA, Hyland A, Reed R, Mahoney MC, Marshall J, Giovino G, et al. Tobacco Cessation May Improve Lung Cancer Patient Survival. *Journal of thoracic oncology* : official publication of the International Association for the Study of Lung Cancer. 2015;10(7):1014-9.
16. Gritz ER, Toll BA, Warren GW. Tobacco use in the oncology setting: advancing clinical practice and research. *Cancer Epidemiol Biomarkers Prev*. 2014;23(1):3-9.

## Impact of smoking on health system costs among cancer patients

17. Warren GW, Marshall JR, Cummings KM, Zevon MA, Reed R, Hysert P, et al. Automated tobacco assessment and cessation support for cancer patients. *Cancer*. 2014;120(4):562-9.
18. Warren GW, Sobus S, Gritz ER. The biological and clinical effects of smoking by patients with cancer and strategies to implement evidence-based tobacco cessation support. *Lancet Oncol*. 2014;15(12):e568-80.
19. Statistics Canada. Current smoking trends 2015 [Available from: <https://www.statcan.gc.ca/pub/82-624-x/2012001/article/11676-eng.htm>].
20. Tota JE, Ramanakumar AV, Franco EL. Lung cancer screening: review and performance comparison under different risk scenarios. *Lung*. 2014;192(1):55-63.
21. Cancer Care Ontario. Cancer Care Ontario's Data Book - 2016-2017. 2016 [updated September 2016]. Available from: <https://cancercare.on.ca/ext/databook/db1516/>.
22. Guidelines on person-level costing using administrative databases in Ontario [Internet]. 2013. Available from: [http://www.hsprn.ca/uploads/files/Guidelines\\_on\\_PersonLevel\\_Costing\\_May\\_2013.pdf](http://www.hsprn.ca/uploads/files/Guidelines_on_PersonLevel_Costing_May_2013.pdf).
23. Ontario Ministry of Health and Long-Term Care. Schedule of Benefits: Physician Services under the Health Insurance Act 2015 [Available from: [http://www.health.gov.on.ca/en/pro/programs/ohip/sob/physserv/sob\\_master20151221.pdf](http://www.health.gov.on.ca/en/pro/programs/ohip/sob/physserv/sob_master20151221.pdf)].
24. Thein HH, Isaranuwatthai W, Campitelli MA, Feld JJ, Yoshida E, Sherman M, et al. Health care costs associated with hepatocellular carcinoma: A population-based study. *Hepatology*. 2013;58(4):1375-84.
25. Statistics Canada. Consumer Price Index (CPI) 2017 [Available from: <http://www5.statcan.gc.ca/cansim/a26?lang=eng&retrLang=eng&id=3260020&paSer=&pattern=&stByVal=1&p1=1&p2=37&tabMode=dataTable&csid=>].
26. Ontario Ministry of Health and Long-Term Care. Ontario's LHINs 2017 [Available from: <http://www.lhins.on.ca/>].
27. University of Manitoba. Concept: Adjusted Clinical Groups(R) (ACG(R)) - Overview 2015 [Available from: <http://mchp-appserv.cpe.umanitoba.ca/viewConcept.php?printer=Y&conceptID=1304>].
28. Glick HA, Doshi JA, Sonnad SS, Polsky D. *Economic evaluation in clinical trials*: OUP Oxford; 2014.
29. Brown ML, Riley GF, Potosky AL, Etzioni RD. Obtaining long-term disease specific costs of care: application to Medicare enrollees diagnosed with colorectal cancer. *Med Care*. 1999;37(12):1249-59.
30. Taplin SH, Barlow W, Urban N, Mandelson MT, Timlin DJ, Ichikawa L, et al. Stage, age, comorbidity, and direct costs of colon, prostate, and breast cancer care. *J Natl Cancer Inst*. 1995;87(6):417-26.
31. Barber J, Thompson S. Multiple regression of cost data: use of generalised linear models. *Journal of health services research & policy*. 2004;9(4):197-204.
32. Barber J, Thompson S. Multiple regression of cost data: use of generalised linear models. *J Health Serv Res Policy*. 2004;9(4):197-204.
33. Rezaei S, Karami Matin B, Hajizadeh M, Baziyar M, Akbari Sari A. Economic burden of smoking in Iran: A prevalence-based annual cost approach. *Asian Pacific Journal of Cancer Prevention*. 2017;18(10):2867-73.

## Impact of smoking on health system costs among cancer patients

- 1  
2  
3 34. Husaini BA, Levine RS, Lammers P, Hull P, Novotny M, Moonis M. Smoking,  
4 depression, and hospital costs of respiratory cancers: Examining race and sex variation. *Family*  
5 *Medicine and Community Health*. 2017;5(1):29-42.  
6  
7 35. Raymakers AJN, Mayo J, Lam S, FitzGerald JM, Whitehurst DGT, Lynd LD. Cost-  
8 Effectiveness Analyses of Lung Cancer Screening Strategies Using Low-Dose Computed  
9 Tomography: A Systematic Review. *Applied Health Economics and Health Policy*.  
10 2016;14(4):409-18.  
11 36. Feirman SP, Glasser AM, Teplitskaya L, Holtgrave DR, Abrams DB, Niaura RS, et al.  
12 Medical costs and quality-adjusted life years associated with smoking: a systematic review.  
13 *BMC public health*. 2016;16:646.  
14 37. Krueger H, Turner D, Krueger J, Ready AE. The economic benefits of risk factor  
15 reduction in Canada: tobacco smoking, excess weight and physical inactivity. *Can J Public*  
16 *Health*. 2014;105(1):e69-e78.  
17 38. Krueger J. Variation across Canada in the economic burden attributable to excess weight,  
18 tobacco smoking and physical inactivity. *Canadian Journal of Public Health*. 2015;106(4):E171.  
19  
20  
21  
22  
23  
24  
25  
26  
27  
28  
29  
30  
31  
32  
33  
34  
35  
36  
37  
38  
39  
40  
41  
42  
43  
44  
45  
46  
47  
48  
49  
50  
51  
52  
53  
54  
55  
56  
57  
58  
59  
60

## S1 Appendix: Flow diagram on the number of excluded patients

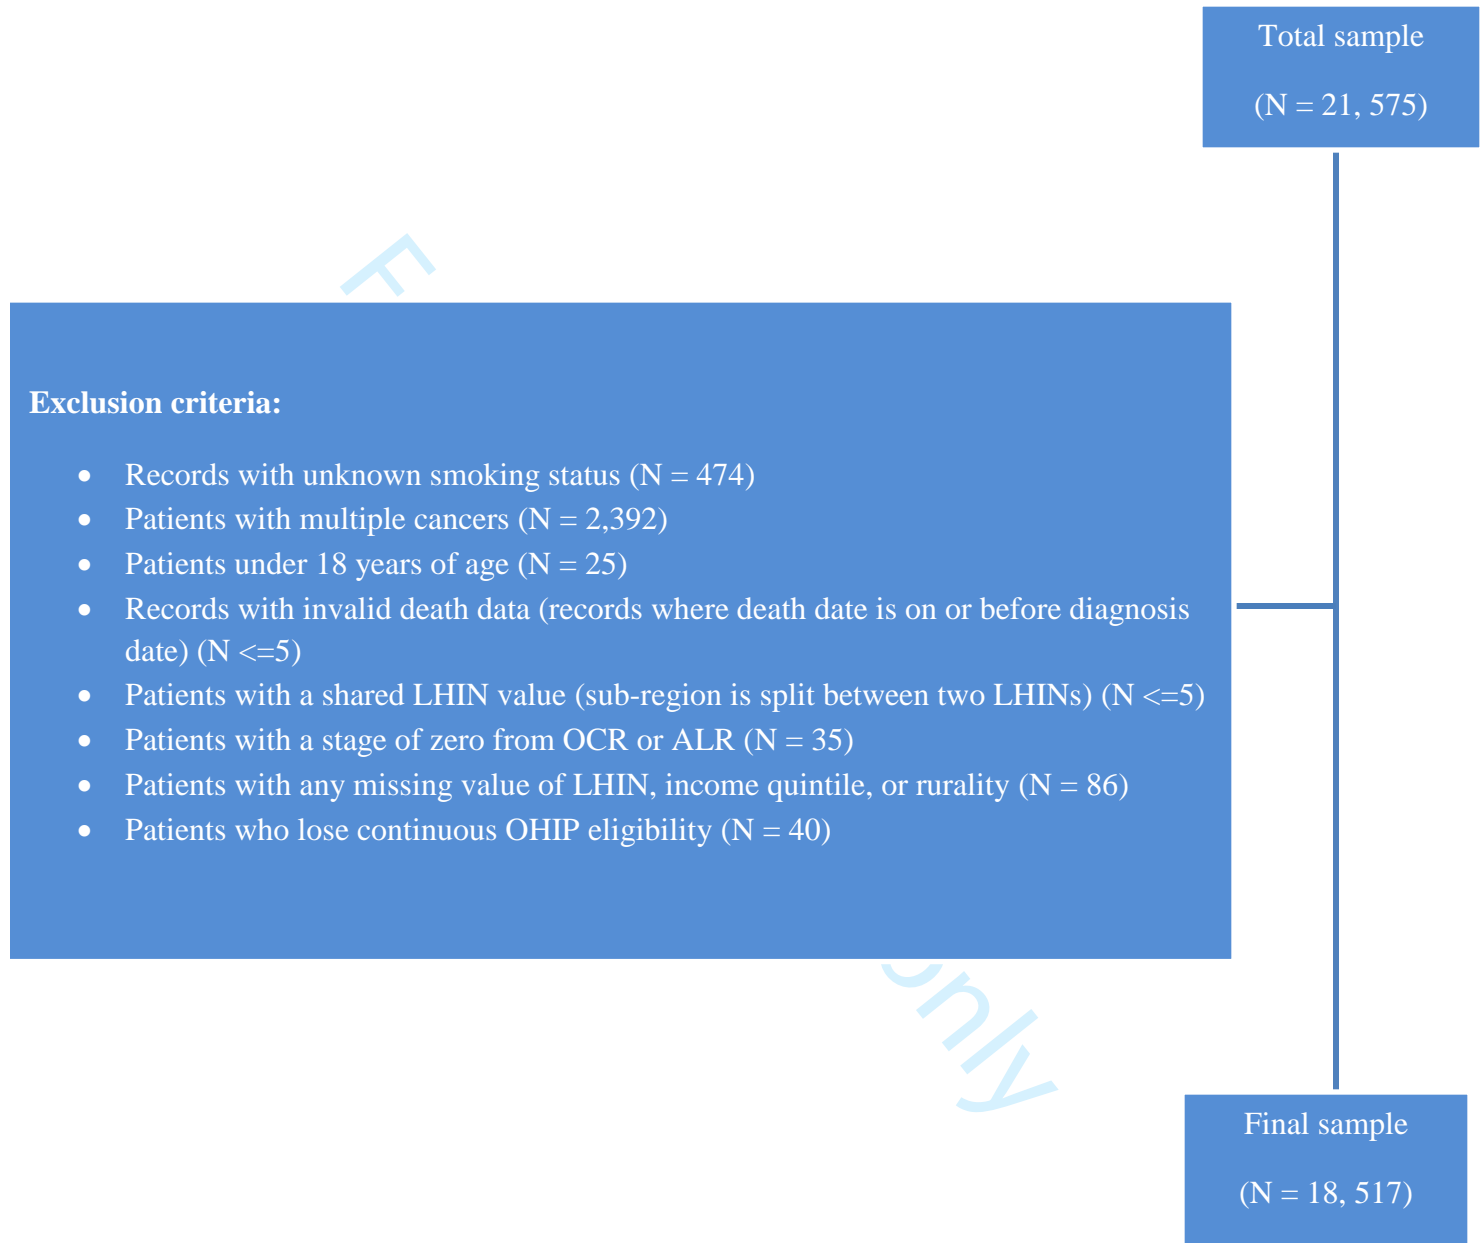



## S2 Appendix: Data elements and their definition of Cancer Care Ontario's Smoking Cessation Dataset

| Data Element               | Definition                                                                                                                                                                                                                                                                                                                                                                                                                                                                                                                                                                                           |
|----------------------------|------------------------------------------------------------------------------------------------------------------------------------------------------------------------------------------------------------------------------------------------------------------------------------------------------------------------------------------------------------------------------------------------------------------------------------------------------------------------------------------------------------------------------------------------------------------------------------------------------|
| Patient Chart Number       | Patient identifier code that is unique within the healthcare facility.                                                                                                                                                                                                                                                                                                                                                                                                                                                                                                                               |
| Submitting Hospital Number | The MOHLTC healthcare facility that submits activity to CCO.                                                                                                                                                                                                                                                                                                                                                                                                                                                                                                                                         |
| Registration Date          | Date this patient was first registered at this RCC and/or hospital for this disease.                                                                                                                                                                                                                                                                                                                                                                                                                                                                                                                 |
| Disease Sequence Number    | The numeric sequence assigned to a primary cancer for a patient at a specific healthcare facility.                                                                                                                                                                                                                                                                                                                                                                                                                                                                                                   |
| Visit Hospital Number      | MOHLTC Master Number and name for the reporting healthcare facility where the cancer activity occurred (known by CIHI as Institution Numbers).                                                                                                                                                                                                                                                                                                                                                                                                                                                       |
| Visit Program Code         | Primary cancer programs for clinic, planning and treatment activity. Includes; Radiation (RAD), Systemic (SYS), Surgical (SUR), Research (RE), Palliative (PA), Preventative Oncology (PO), or Psychosocial Oncology (PSO).                                                                                                                                                                                                                                                                                                                                                                          |
| SMK_Q1                     | Patient self-reported as being a current smoker or indicated they had smoked within the past 6 months.                                                                                                                                                                                                                                                                                                                                                                                                                                                                                               |
| SMK_Q1 Date                | The date the patient was asked SMK_Q1 (smoking status question).                                                                                                                                                                                                                                                                                                                                                                                                                                                                                                                                     |
| SMK_Q2                     | Patient was advised of the benefits of smoking cessation.                                                                                                                                                                                                                                                                                                                                                                                                                                                                                                                                            |
| SMK_Q3                     | Patient was recommended a referral to a smoking cessation program.                                                                                                                                                                                                                                                                                                                                                                                                                                                                                                                                   |
| SMK_Q3 Date                | The date when the patient was asked SMK_Q3 (assessed for quitting question).                                                                                                                                                                                                                                                                                                                                                                                                                                                                                                                         |
| SMK_Q4                     | Type of referral selected by patient. Referral is the act of directing or sending a patient to cessation service(s) for further action or support in making a quit attempt and becoming smoke free. The service should be arranged through the RCC (e.g., to a quit coach or to Canadian Cancer Society's Smokers Helpline fax referral program) to help the patient quit smoking. A referral is not simply the act of providing written information. Internal cessation referrals include services provided by the RCC (e.g. quit coaches), and external referrals are referred to outside the RCC. |

Legend: MOHLTC = Ministry of Health and Long-Term Care; CCO = Cancer Care Ontario; RCC = Regional Cancer Centre; CIHI = Canadian Institute for Health Information

**S3 Appendix: Completed STROBE statement, a checklist of items that should be included in reports of cohort studies**

|                              | <b>Item No</b> | <b>Recommendation</b>                                                                                                                                                          | <b>Page number</b> |
|------------------------------|----------------|--------------------------------------------------------------------------------------------------------------------------------------------------------------------------------|--------------------|
| <b>Title and abstract</b>    | 1              | (a) Indicate the study's design with a commonly used term in the title or the abstract                                                                                         | 1                  |
|                              |                | (b) Provide in the abstract an informative and balanced summary of what was done and what was found                                                                            | 2                  |
| <b>Introduction</b>          |                |                                                                                                                                                                                |                    |
| Background/rationale         | 2              | Explain the scientific background and rationale for the investigation being reported                                                                                           | 4                  |
| Objectives                   | 3              | State specific objectives, including any prespecified hypotheses                                                                                                               | 4                  |
| <b>Methods</b>               |                |                                                                                                                                                                                |                    |
| Study design                 | 4              | Present key elements of study design early in the paper                                                                                                                        | 4                  |
| Setting                      | 5              | Describe the setting, locations, and relevant dates, including periods of recruitment, exposure, follow-up, and data collection                                                | 4, 5, 6            |
| Participants                 | 6              | (a) Give the eligibility criteria, and the sources and methods of selection of participants. Describe methods of follow-up                                                     | 4, 5               |
|                              |                | (b) For matched studies, give matching criteria and number of exposed and unexposed                                                                                            | N/A                |
| Variables                    | 7              | Clearly define all outcomes, exposures, predictors, potential confounders, and effect modifiers. Give diagnostic criteria, if applicable                                       | 5, 6               |
| Data sources/<br>measurement | 8*             | For each variable of interest, give sources of data and details of methods of assessment (measurement). Describe comparability of assessment methods if there is more than one | 5, 6               |

|                        |     |                                                                                                                                                                                                     |                          |
|------------------------|-----|-----------------------------------------------------------------------------------------------------------------------------------------------------------------------------------------------------|--------------------------|
|                        |     | group                                                                                                                                                                                               |                          |
| Bias                   | 9   | Describe any efforts to address potential sources of bias                                                                                                                                           | 6, 7, 9, 10              |
| Study size             | 10  | Explain how the study size was arrived at                                                                                                                                                           | 4, 5                     |
| Quantitative variables | 11  | Explain how quantitative variables were handled in the analyses. If applicable, describe which groupings were chosen and why                                                                        | 5, 6, 7                  |
| Statistical methods    | 12  | (a) Describe all statistical methods, including those used to control for confounding                                                                                                               | 7                        |
|                        |     | (b) Describe any methods used to examine subgroups and interactions                                                                                                                                 | N/A                      |
|                        |     | (c) Explain how missing data were addressed                                                                                                                                                         | 4                        |
|                        |     | (d) If applicable, explain how loss to follow-up was addressed                                                                                                                                      | 4                        |
|                        |     | (e) Describe any sensitivity analyses                                                                                                                                                               | N/A                      |
| <b>Results</b>         |     |                                                                                                                                                                                                     |                          |
| Participants           | 13* | (a) Report numbers of individuals at each stage of study—e.g. numbers potentially eligible, examined for eligibility, confirmed eligible, included in the study, completing follow-up, and analyzed | 5 (S1 Appendix), 7, 8, 9 |
|                        |     | (b) Give reasons for non-participation at each stage                                                                                                                                                | N/A                      |
|                        |     | (c) Consider use of a flow diagram                                                                                                                                                                  | 5 (S1 Appendix)          |
| Descriptive data       | 14* | (a) Give characteristics of study participants (e.g. demographic, clinical, social) and information on exposures and potential confounders                                                          | 7, 8, 9                  |
|                        |     | (b) Indicate number of participants with missing data for each variable of interest                                                                                                                 | 5 (S1 Appendix)          |

|                          |     |                                                                                                                                                                                                                |           |
|--------------------------|-----|----------------------------------------------------------------------------------------------------------------------------------------------------------------------------------------------------------------|-----------|
|                          |     | (c) Summarize follow-up time (e.g., average and total amount)                                                                                                                                                  | N/A       |
| Outcome data             | 15* | Report numbers of outcome events or summary measures over time                                                                                                                                                 | 7, 8, 9   |
| Main results             | 16  | (a) Give unadjusted estimates and, if applicable, confounder-adjusted estimates and their precision (e.g., 95% confidence interval). Make clear which confounders were adjusted for and why they were included | 9         |
|                          |     | (b) Report category boundaries when continuous variables were categorized                                                                                                                                      | N/A       |
|                          |     | (c) If relevant, consider translating estimates of relative risk into absolute risk for a meaningful time period                                                                                               | N/A       |
| Other analyses           | 17  | Report other analyses done—e.g. analyses of subgroups and interactions, and sensitivity analyses                                                                                                               | N/A       |
| <b>Discussion</b>        |     |                                                                                                                                                                                                                |           |
| Key results              | 18  | Summarize key results with reference to study objectives                                                                                                                                                       | 9         |
| Limitations              | 19  | Discuss limitations of the study, taking into account sources of potential bias or imprecision. Discuss both direction and magnitude of any potential bias                                                     | 10, 11    |
| Interpretation           | 20  | Give a cautious overall interpretation of results considering objectives, limitations, multiplicity of analyses, results from similar studies, and other relevant evidence                                     | 9, 10, 11 |
| Generalizability         | 21  | Discuss the generalizability (external validity) of the study results                                                                                                                                          | 11        |
| <b>Other information</b> |     |                                                                                                                                                                                                                |           |
| Funding                  | 22  | Give the source of funding and the role of the funders for the present study and, if applicable,                                                                                                               | 12, 13    |

|  |  |                                                              |  |
|--|--|--------------------------------------------------------------|--|
|  |  | for the original study on which the present article is based |  |
|--|--|--------------------------------------------------------------|--|

\*Give information separately for exposed and unexposed groups.

N/A = Not applicable

Note: An Explanation and Elaboration article discusses each checklist item and gives methodological background and published examples of transparent reporting. The STROBE checklist is best used in conjunction with this article (freely available on the Web sites of PLoS Medicine at <http://www.plosmedicine.org/>, Annals of Internal Medicine at <http://www.annals.org/>, and Epidemiology at <http://www.epidem.com/>). Information on the STROBE Initiative is available at <http://www.strobe-statement.org>.

**S4 Appendix: Unadjusted monthly healthcare costs between cancer patients who were smokers and non-smokers (2016 CAD)**



Legend: CAD = Canadian dollars.

**S3 Appendix: Completed STROBE statement, a checklist of items that should be included in reports of cohort studies**

|                              | <b>Item No</b> | <b>Recommendation</b>                                                                                                                                                          | <b>Page number</b> |
|------------------------------|----------------|--------------------------------------------------------------------------------------------------------------------------------------------------------------------------------|--------------------|
| <b>Title and abstract</b>    | 1              | (a) Indicate the study's design with a commonly used term in the title or the abstract                                                                                         | 1                  |
|                              |                | (b) Provide in the abstract an informative and balanced summary of what was done and what was found                                                                            | 2                  |
| <b>Introduction</b>          |                |                                                                                                                                                                                |                    |
| Background/rationale         | 2              | Explain the scientific background and rationale for the investigation being reported                                                                                           | 4                  |
| Objectives                   | 3              | State specific objectives, including any prespecified hypotheses                                                                                                               | 4                  |
| <b>Methods</b>               |                |                                                                                                                                                                                |                    |
| Study design                 | 4              | Present key elements of study design early in the paper                                                                                                                        | 4                  |
| Setting                      | 5              | Describe the setting, locations, and relevant dates, including periods of recruitment, exposure, follow-up, and data collection                                                | 4, 5, 6            |
| Participants                 | 6              | (a) Give the eligibility criteria, and the sources and methods of selection of participants. Describe methods of follow-up                                                     | 4, 5               |
|                              |                | (b) For matched studies, give matching criteria and number of exposed and unexposed                                                                                            | N/A                |
| Variables                    | 7              | Clearly define all outcomes, exposures, predictors, potential confounders, and effect modifiers. Give diagnostic criteria, if applicable                                       | 5, 6               |
| Data sources/<br>measurement | 8*             | For each variable of interest, give sources of data and details of methods of assessment (measurement). Describe comparability of assessment methods if there is more than one | 5, 6               |

|                        |     |                                                                                                                                                                                                   |                          |
|------------------------|-----|---------------------------------------------------------------------------------------------------------------------------------------------------------------------------------------------------|--------------------------|
|                        |     | group                                                                                                                                                                                             |                          |
| Bias                   | 9   | Describe any efforts to address potential sources of bias                                                                                                                                         | 6, 7, 9, 10              |
| Study size             | 10  | Explain how the study size was arrived at                                                                                                                                                         | 4, 5                     |
| Quantitative variables | 11  | Explain how quantitative variables were handled in the analyses. If applicable, describe which groupings were chosen and why                                                                      | 5, 6, 7                  |
| Statistical methods    | 12  | (a) Describe all statistical methods, including those used to control for confounding                                                                                                             | 7                        |
|                        |     | (b) Describe any methods used to examine subgroups and interactions                                                                                                                               | N/A                      |
|                        |     | (c) Explain how missing data were addressed                                                                                                                                                       | 4                        |
|                        |     | (d) If applicable, explain how loss to follow-up was addressed                                                                                                                                    | 4                        |
|                        |     | (e) Describe any sensitivity analyses                                                                                                                                                             | N/A                      |
| <b>Results</b>         |     |                                                                                                                                                                                                   |                          |
| Participants           | 13* | (a) Report numbers of individuals at each stage of study—eg numbers potentially eligible, examined for eligibility, confirmed eligible, included in the study, completing follow-up, and analysed | 5 (S1 Appendix), 7, 8, 9 |
|                        |     | (b) Give reasons for non-participation at each stage                                                                                                                                              | N/A                      |
|                        |     | (c) Consider use of a flow diagram                                                                                                                                                                | 5 (S1 Appendix)          |
| Descriptive data       | 14* | (a) Give characteristics of study participants (eg demographic, clinical, social) and information on exposures and potential confounders                                                          | 7, 8, 9                  |
|                        |     | (b) Indicate number of participants with missing data for each variable of interest                                                                                                               | 5 (S1 Appendix)          |



|                          |     |                                                                                                                                                                                                              |           |
|--------------------------|-----|--------------------------------------------------------------------------------------------------------------------------------------------------------------------------------------------------------------|-----------|
|                          |     | (c) Summarise follow-up time (eg, average and total amount)                                                                                                                                                  | N/A       |
| Outcome data             | 15* | Report numbers of outcome events or summary measures over time                                                                                                                                               | 7, 8, 9   |
| Main results             | 16  | (a) Give unadjusted estimates and, if applicable, confounder-adjusted estimates and their precision (eg, 95% confidence interval). Make clear which confounders were adjusted for and why they were included | 9         |
|                          |     | (b) Report category boundaries when continuous variables were categorized                                                                                                                                    | N/A       |
|                          |     | (c) If relevant, consider translating estimates of relative risk into absolute risk for a meaningful time period                                                                                             | N/A       |
| Other analyses           | 17  | Report other analyses done—eg analyses of subgroups and interactions, and sensitivity analyses                                                                                                               | N/A       |
| <b>Discussion</b>        |     |                                                                                                                                                                                                              |           |
| Key results              | 18  | Summarise key results with reference to study objectives                                                                                                                                                     | 9         |
| Limitations              | 19  | Discuss limitations of the study, taking into account sources of potential bias or imprecision. Discuss both direction and magnitude of any potential bias                                                   | 10, 11    |
| Interpretation           | 20  | Give a cautious overall interpretation of results considering objectives, limitations, multiplicity of analyses, results from similar studies, and other relevant evidence                                   | 9, 10, 11 |
| Generalisability         | 21  | Discuss the generalisability (external validity) of the study results                                                                                                                                        | 11        |
| <b>Other information</b> |     |                                                                                                                                                                                                              |           |
| Funding                  | 22  | Give the source of funding and the role of the funders for the present study and, if applicable,                                                                                                             | 12, 13    |

|  |  |                                                              |  |
|--|--|--------------------------------------------------------------|--|
|  |  | for the original study on which the present article is based |  |
|--|--|--------------------------------------------------------------|--|

\*Give information separately for exposed and unexposed groups.

N/A = Not applicable

Note: An Explanation and Elaboration article discusses each checklist item and gives methodological background and published examples of transparent reporting. The STROBE checklist is best used in conjunction with this article (freely available on the Web sites of PLoS Medicine at <http://www.plosmedicine.org/>, Annals of Internal Medicine at <http://www.annals.org/>, and Epidemiology at <http://www.epidem.com/>). Information on the STROBE Initiative is available at <http://www.strobe-statement.org>.
